## Identify non-mutational p53 loss of function in human cancers

Qianpeng Li<sup>1,2,3,\*</sup>, Yang Zhang<sup>1,2,3,\*</sup>, Zhang Zhang<sup>1,2,3</sup>, Ann L. Oberg<sup>4</sup>, David E. Kozono<sup>5</sup>, Hua Lu<sup>6</sup>, Jann N. Sarkaria<sup>7</sup>, Lina Ma<sup>1,2,3,#</sup>, Ligu Wang<sup>4,8,9,#</sup>

<sup>1</sup> China National Center for Bioinformation, Beijing 100101, China

<sup>2</sup> National Genomics Data Center & CAS Key Laboratory of Genome Sciences and Information, Beijing Institute of Genomics, Chinese Academy of Sciences, Beijing 100101, China

<sup>3</sup> University of Chinese Academy of Sciences, Beijing 100101, China

<sup>4</sup> Division of Computational Biology, Mayo Clinic College of Medicine and Science, Rochester, MN 55905, USA

<sup>5</sup> Department of Radiation Oncology, Dana-Farber Cancer Institute and Brigham and Women's Hospital, Boston, MA 02215, USA

<sup>6</sup> Department of Biochemistry & Molecular Biology and Tulane Cancer Center, Tulane University School of Medicine, New Orleans, LA 70112, USA

<sup>7</sup> Department of Radiation Oncology, Mayo Clinic College of Medicine and Science, Rochester, MN, 55905, USA

<sup>8</sup> Department of Biochemistry and Molecular Biology, Mayo Clinic College of Medicine and Science, Rochester, MN, 55905 USA

<sup>9</sup> Bioinformatics and Computational Biology Graduate Program, University of Minnesota Rochester, Rochester, MN 55904, USA

\*Equal contributions

Author email:

Qianpeng Li: [liqianpeng2019d@big.ac.cn](mailto:liqianpeng2019d@big.ac.cn)

Yang Zhang: [zhangyang@big.ac.cn](mailto:zhangyang@big.ac.cn)

Zhang Zhang: [zhangzhang@big.ac.cn](mailto:zhangzhang@big.ac.cn)

Ann L. Oberg: [Oberg.Ann@mayo.edu](mailto:Oberg.Ann@mayo.edu)

David E. Kozono: [dkozono@bwh.harvard.edu](mailto:dkozono@bwh.harvard.edu)

Hua Lu: [hlu2@tulane.edu](mailto:hlu2@tulane.edu)

Jann N. Sarkaria: [Sarkaria.Jann@mayo.edu](mailto:Sarkaria.Jann@mayo.edu)

#Corresponding Authors:

Lina Ma, Ph.D.

Associate Professor

National Genomics Data Center

China National Center for Bioinformation / Beijing Institute of Genomics, Chinese Academy of Sciences  
NO.1 Beichen West Road, Chaoyang District, Beijing 100101, China

Phone: 86-10-84097845

E-mail: [malina@big.ac.cn](mailto:malina@big.ac.cn)

Ligu Wang, Ph.D.

Associate Professor

Division of Computational Biology

Mayo Clinic College of Medicine and Science

200 First Street SW Rochester, MN 55905, United States of America

Phone: 1-507-284-8728

Fax: 1-507-284-0745

E-mail: [Wang.Ligu@mayo.edu](mailto:Wang.Ligu@mayo.edu)

## 1 **Abstract**

2 An accurate assessment of *TP53* status is critical for cancer genomic medicine. Tumors with non-  
3 mutational p53 inactivations that failed to identify from DNA sequencing are largely misclassified as  
4 p53-normal, which leads to inaccurate prognosis and downstream association analyses. Here we built  
5 the support vector machine (SVM) models to systematically evaluate p53's functional status in  
6 multiple TCGA cancer cohorts. Cross-validation using independent samples demonstrated the  
7 excellent performance of the SVM models with mean AUC = 0.9845, precision = 0.9844 and recall =  
8 0.9825. Our model revealed that most (87–100%) wild-type *TP53* (*TP53*<sup>WT</sup>) tumors are loss-of-  
9 function. Further analyses revealed that these genetically normal but functionally impaired tumors  
10 (*TP53*<sup>WT</sup>-pLoF) exhibit similar genomic characteristics as those p53 mutants with significantly  
11 increased tumor mutation burden, copy number variation burden, aneuploidy score, and hypoxia score.  
12 Clinically, compared to p53-normal tumors, patients with *TP53*<sup>WT</sup>-pLoF tumors have significantly  
13 shortened overall survival and disease-free survival and exhibited increased sensitivity to platinum-  
14 based chemotherapy and radiation therapy. The increased sensitivity to radiation therapy is further  
15 validated in glioblastoma patient-derived xenografts models.

16

17

## 1 **Introduction**

2 Genomic variants identified from tumor DNA sequencing not only improved our understanding of  
3 cancer genetics (Alexandrov et al., 2013; Stephens et al., 2009; Vogelstein et al., 2013), but also  
4 revolutionized health care by providing diagnoses, informing prognoses, and guiding precision  
5 medicine. For example, breast cancers with loss-of-function mutations in *BRCA1/BRCA2* are sensitive  
6 to PARP inhibitors (Bryant et al., 2005; Farmer et al., 2005). Gain or loss of gene function due to  
7 genetic alterations is one of the main drivers of cancer development, and the identification of causal  
8 and targetable genetic aberrations remains a high priority in cancer genomic studies. However, genetic  
9 alteration is not the only mechanism to activate or disrupt gene function; alternative mechanisms  
10 besides direct genetic alterations include DNA methylation and RNA methylation (Agirre et al., 2003;  
11 Glodzik et al., 2020; Tian, Lai, Yu, Li, & Chen, 2020), histone methylation and acetylation (Zhang &  
12 Reinberg, 2001), chromatin topology and nucleosome positioning (Gorkin, Leung, & Ren, 2014; Jiang  
13 & Pugh, 2009), RNA editing (Ruan et al., 2022), RNA splicing (Surget, Khoury, & Bourdon, 2013),  
14 activation/inactivation of upstream regulators (Schoenfelder & Fraser, 2019), protein-protein  
15 interaction (Momand, Zambetti, Olson, George, & Levine, 1992; Teufel, Bycroft, & Fersht, 2009),  
16 and post-translational modifications such as phosphorylation, acetylation, ubiquitination, and  
17 SUMOylation (Ashcroft, Kubbutat, & Vousden, 1999; Igelmann, Neubauer, & Ferbeyre, 2019; Karve  
18 & Cheema, 2011). These molecular mechanisms are prevalent but remain a formidable challenge to  
19 characterize due to heterogeneous causes and a significant impediment for molecular diagnostics,  
20 clinical management, and therapeutic selection for cancer patients.

21  
22 Tumor suppressor p53 (encoded by gene *TP53*) is a transcription factor that binds to its consensus  
23 DNA element and regulates downstream transcriptional programs, and thereby plays critical roles in  
24 preventing tumorigenesis and tumor progression by inducing cell cycle arrest, cell death (apoptosis,  
25 ferroptosis, necrosis, and autophagy), senescence, and DNA damage repair (Liu & Gu, 2022;

1 Mantovani, Collavin, & Del Sal, 2019; Vousden & Lane, 2007). *TP53* is one of the most extensively  
2 studied genes, and its transcriptional targets have been well characterized, including many that have  
3 been experimentally validated (Fischer, 2017). Meanwhile, it stands out as the most commonly  
4 mutated tumor suppressor gene that has been genetically inactivated in 20 cancer types (Jia & Zhao,  
5 2019), and the somatic mutation frequencies are greater than 50% in ovarian, esophageal, pancreatic,  
6 lung, colorectal, uterine, head and neck, oral (gingivobuccal), soft tissue (leiomyosarcoma), gastric  
7 and biliary tract cancers (ICGC: <https://dcc.icgc.org/genes/ENSG00000141510/mutations>). *TP53* has  
8 become a promising therapeutic target for human cancers. It is found that the restoration of p53  
9 function in established tumors causes tumor regression *in vivo*, which represents a new and promising  
10 therapeutic approach (Martins, Brown-Swigart, & Evan, 2006; Ventura et al., 2007). p53 activities  
11 have been frequently implicated in chemo- and radiation therapy (Bertheau et al., 2002; Bertheau et  
12 al., 2007; Concin et al., 2000; Lowe et al., 1994; Skinner et al., 2012; Tchelebi, Ashamalla, & Graves,  
13 2014), and p53 dysfunction is also associated with immunosuppression and immune evasion (Cortez  
14 et al., 2016; Guo, Yu, Xiao, Celis, & Cui, 2017; Maddalena et al., 2021). Therefore, an accurate  
15 assessment of p53 functional status is critical for prognosis and personalized medicine.

16

17 The p53 protein is a potent roadblock to tumor development, therefore, it is generally considered that  
18 p53 function is inactivated even in genetically *TP53* wild-type tumors. Such concept is supported by  
19 sporadic studies (Bosari et al., 1995; Isaacs, Hardman, Carman, Barrett, & Weissman, 1998; Moll,  
20 LaQuaglia, Benard, & Riou, 1995; Moll, Riou, & Levine, 1992; Tominaga et al., 1993), but has not  
21 been evaluated systematically in large cohorts of clinical samples. In this study, we aim to predict p53  
22 functional status from the expression profile of its transcriptional targets, particularly for those tumors  
23 with wild-type *TP53*. To this end, we analyzed the whole-exome sequencing (WES) and RNA-seq  
24 data generated from TCGA breast cancer (BRCA), lung cancer (LUNG), esophagus cancer (ESCA),  
25 and colon cancer (COAD) cohorts. We chose these four cancer types because of abundant cases of

1 *TP53* truncating mutations that can be considered as the ground truth of loss of function (LoF) and  
2 used to train the SVM models.

3

4 We calculated the composite expression of curated p53 targets as a surrogate measure of p53 activity,  
5 and trained SVM models to predict p53's status. Specifically, we first cataloged cancer type-specific  
6 *TP53* targets through a systematic literature review and performed meta-analyses of p53 ChIP-seq and  
7 RNA-seq data. Then, we calculated the composite expression score (CES) from p53 activated and  
8 repressed genes using algorithms including GSVA (gene set variation analysis)(Hanzelmann, Castelo,  
9 & Guinney, 2013), ssGSEA (single sample gene set enrichment analysis) (Barbie et al., 2009),  
10 combined Z-score (E. Lee, Chuang, Kim, Ideker, & Lee, 2008; Tomfohr, Lu, & Kepler, 2005), and the  
11 first principal component of PCA (principal component analysis). Finally, we trained SVM models  
12 using CES scores from non-cancerous normal tissues (designated as the "NT" group in which p53  
13 function is assumed to be normal) as well as tumor samples harboring *TP53* truncating mutations  
14 (designated as the "TM" group in which p53's tumor suppressor function is assumed to be lost). Ten-  
15 fold cross-validation demonstrated the excellent performance of our SVM models in discriminating  
16 NT and TM samples.

17

18 We re-evaluated p53 function status of TCGA tumors with the SVM models and compared genome  
19 and chromosome instability measurements to examine the prediction results. We found that almost all  
20 missense mutation samples (termed the "MM" group hereafter) were predicted to be LoF as expected.  
21 Most *TP53* wild-type samples (termed the "WT" group hereafter) were also predicted to be LoF  
22 (termed *TP53*<sup>WT</sup>-pLoF), suggesting the functional p53 deficiency despite genetic intactness. Further  
23 analyses suggested these *TP53*<sup>WT</sup>-pLoF tumors manifest distinctive genomic characteristics compared  
24 to other *TP53*<sup>WT</sup> samples that are predicted to be normal (termed *TP53*<sup>WT</sup>-pN). *TP53*<sup>WT</sup>-pLoF tumor  
25 genomes have dramatically increased tumor mutation burden (TMB), copy number variation burden,

1 aneuploidy score, and hypoxia score, consistent with p53's function as a DNA damage repair regulator  
2 and the "guardian of the genome".

3

4 Clinically,  $TP53^{WT}$ -pLoF patients have significantly shortened overall or disease-free survival  
5 compared to  $TP53^{WT}$ -pN patients. Also, our data demonstrate that  $TP53^{WT}$ -pLoF tumors exhibited  
6 significantly increased sensitivities to radio-and chemotherapy, providing useful information for  
7 personalized medicine. The increased sensitivity of  $TP53^{WT}$ -pLoF tumors to radiation therapy is  
8 further confirmed by the glioblastoma patient derived xenografts models (PDX).

## 9 **Results**

### 10 **Identification of p53 target genes**

11 Thousands of transcriptional targets of p53 have been reported (Fischer, 2017). Through systematic  
12 literature review, meta-analyses of the 32 p53 ChIP-seq datasets curated by the ReMap 2020 database  
13 (Cheneby et al., 2020), and the RNA-seq data of 54 tissues generated from the GTEx project, we  
14 identified 147 high-confidence transcriptional targets of p53 (**Figure 1 a**). These 147 genes were  
15 expressed across different tissues and showed p53 binding to their promoters (**Supplementary Table**  
16 **1**). To further confirm these p53 target genes, we reanalyzed RNA-seq and ChIP-seq data prior to and  
17 after p53 activation in MCF-7 breast cancer cells harboring the wild-type  $TP53$ . Expectedly, there was  
18 no or very weak p53 binding at the promoters of p53 target genes (such as *ATF3*, *BTG2*) before p53  
19 was activated by gamma irradiation, while prominent p53 bindings were observed, and the expression  
20 of these targets was consistently increased after p53 activation (Hafner et al., 2017) (**Supplementary**  
21 **Figure 1**).

22

23 p53 regulated transcriptional programs vary by cell type (Bouvard et al., 2000; Burns, Bernhard, & El-

1 Deiry, 2001; Karsli Uzunbas, Ahmed, & Sammons, 2019). To define cancer-specific p53 targets, we  
2 performed gene expression analyses between NT and TM groups (samples assigned to the testing set  
3 were excluded) using TCGA RNA-seq data and overlapped the identified differentially expressed  
4 genes (DEGs) with the previously selected 147 genes (**Figure 1 a**). We selected 47, 55, 36, and 50  
5 p53 targets for BRCA, LUNG, ESCA, and COAD, respectively. 16 genes (*ABCB1*, *ANLN*, *BIRC5*,  
6 *CCNB1*, *CCNB2*, *CDC20*, *CDC25C*, *CDK1*, *CKS2*, *ECT2*, *FAM13C*, *NEK2*, *PCNA*, *PLK1*, *PMAIP1*,  
7 *PRCI*) were shared by all four cancer types. As p53 core targets, these 16 genes are significantly  
8 enriched in cell cycle control and DNA damage response pathways (**Supplementary Figure 2**).

### 9 **Composite expression of p53 target genes**

10 We interrogated the expression profiles of p53 target genes in four groups, including NT, WT, MM  
11 and TM. As expected, p53-activated and p53-repressed genes exhibited the opposite trends; p53-  
12 activated genes were significantly decreased in the TM group, whereas p53-repressed genes were  
13 significantly increased in the TM group, consistent with the p53 LoF status in this group (**Figure 1 b-**  
14 **d**). p53 target gene expression patterns were similar between the MM and TM groups (**Figure 1 b-d**),  
15 suggesting impaired p53 function in the MM samples, and that missense/in-frame mutations and  
16 truncating mutations seem to have similar impact on p53's cellular activity. This is consistent with the  
17 fact that most missense mutations were located within the DNA binding domain, disrupting the ability  
18 of p53 to bind to DNA and transactivate its downstream targets (Kato et al., 2003).

19

20 In the LUNG and BRCA cohorts, the WT group exhibited an intermediate state between the NT and  
21 TM groups, which suggests that p53 function might be compromised in majority of these samples,  
22 despite their intact DNA sequences (**Figure 1 b-c**). In the COAD cohort, the expression profile of the  
23 WT group was virtually indistinguishable from those of the mutant groups (MM + TM) (**Figure 1 d**).  
24 Collectively, these data indicated p53 lost its tumor suppressor function in *TP53*<sup>WT</sup> samples.

## 1 **Training and evaluating SVM model based on the expression of p53 targets**

2 We hypothesized that both mutational and non-mutational p53 inactivation could be predicted from  
3 the altered expression of its transcriptional targets. Toward this end, we calculated the composite  
4 expression score (CES) of p53 target genes using four algorithms, including GSVA (Hanzelmann et  
5 al., 2013), ssGSEA (Barbie et al., 2009), Z-score (E. Lee et al., 2008; Tomfohr et al., 2005), and PCA  
6 (**Supplementary Table 2**). Compared to the expression of individual genes, CES not only provides a  
7 combined and stable measure of p53 activity but also reduces the dimensionality of the expression data  
8 and mitigates potential overfitting of the SVM model.

9  
10 Using LUNG as an example, we observed significant inverse correlations between CES scores  
11 calculated from p53-activated and p53-repressed genes; the Pearson's correlation coefficients were  
12 0.996, -0.998, and -0.749 for GSVA, ssGSEA, and combined Z-score, respectively (**Supplementary**  
13 **Figure 3 a-c**). In addition, there were significant positive correlations (Pearson's correlation  
14 coefficients ranged from 0.874 to 0.996) among CES scores calculated by different algorithms,  
15 indicating high concordance of these algorithms (**Supplementary Figure 3 d-i**). When comparing the  
16 CES scores across the NT, WT, MM, and TM groups, we found CES scores of the NT samples were  
17 closely congregated in a narrow range. In contrast, CES scores calculated from the tumor samples  
18 (including WT, MM, and TM groups) showed a higher degree of dispersion, suggesting the increased  
19 heterogeneity of p53 activity in tumor samples (**Supplementary Figure 4**). Consistent with the gene-  
20 level expression data (**Figure 1 b**), CES scores of WT samples were intermediate between those of NT  
21 and TM, and the CES scores of MM samples resembled those of TM samples (**Figure 2 a-j**). These  
22 results again suggest that p53 function is compromised in most WT samples.

23

24 Next, we trained SVM models using CES scores from the NT group (assuming p53 is functionally  
25 normal) and TM group (assuming p53 is LoF) separately for the four TCGA cancer types, including



1 LUNG, BRCA, COAD, and ESCA. Ten-fold cross-validation demonstrated the excellent performance  
2 of these SVM models. As exemplified by LUNG cohort, the mean precision, recall, F1-score, and  
3 AUROC are  $0.988 \pm 0.013$ ,  $0.986 \pm 0.02$ ,  $0.987 \pm 0.016$ , and  $0.986 \pm 0.02$ , respectively (**Figure 2 k**).  
4 Our SVM model achieved a similar performance for the BRCA cohort (**Supplementary Table 3**). The  
5 smaller cohort sizes and particularly the limited number of truncating mutation cases in other TCGA  
6 cancer types discouraged us from training cancer-specific SVM models. Instead, we compiled a pan-  
7 cancer cohort ( $n = 5160$ ) consisting of 9 cancer types with high *TP53* mutation rates (**Supplementary**  
8 **Figure 5**), including BLCA, BRCA, COAD, ESCA, HNSC, LUNG, LIHC, STAD, and UCES. Using  
9 the same procedures, we selected 27 shared p53 repressed genes and 32 shared p53 activated genes for  
10 this pan-cancer cohort (**Supplementary Figure 5 a and b**), calculated CES scores, and trained an  
11 SVM classifier using the pooled NT ( $n = 453$ ) and TM ( $n = 882$ ) samples (**Supplementary Figure 5**  
12 **c and d**). Despite the intrinsic heterogeneity of different cancer types, our SVM model demonstrated  
13 outstanding performance with high precision ( $0.957 \pm 0.093$ ), recall ( $0.971 \pm 0.018$ ), macro-averaged  
14 F1-score ( $0.942 \pm 0.080$ ), and AUROC ( $0.988 \pm 0.006$ ) (**Supplementary Figure 5 e, Supplementary**  
15 **Table 3**).

## 16 **Predicting p53 status using SVM models**

17 We applied the trained SVM models to predict the p53 status of *TP53*<sup>WT</sup> and *TP53*<sup>MM</sup> tumors that had  
18 been excluded intentionally from the training and testing data. The results showed that most *TP53*<sup>WT</sup>  
19 samples (87%-100%) and almost all the *TP53*<sup>MM</sup> samples (98%-100%) were predicted to be LoF for  
20 all five cohorts, including LUNG, BRCA, COAD, ESCA, and pan-cancer (**Supplementary Figure 6**).  
21 For example, in the LUNG cohort, 94 % of the *TP53*<sup>WT</sup> samples and 100 % of *TP53*<sup>MM</sup> samples were  
22 predicted to be pLoF (**Figure 3 a**). These results suggest the prevalence of p53 inactivation regardless  
23 the *TP53* genetic status, presumably by non-mutational mechanisms (Cross et al., 2011; Gogna, Madan,  
24 Kuppasamy, & Pati, 2012; Sasaki, Nie, & Maki, 2007) .

1 To demonstrate the prognostic value of the SVM prediction, we divided the  $TP53^{WT}$  tumors into two  
2 subgroups including  $TP53^{WT}$ -pLoF, which represents samples predicted to be LoF, and  $TP53^{WT}$ -pN,  
3 which represents samples predicted to be normal. We then compared the overall survival (OS) of  
4 patients from the LUNG cohort. The 10-year OS rates for patients with  $TP53^{WT}$ -pN (n = 20),  $TP53^{WT}$ -  
5 pLoF (n = 310),  $TP53^{MM}$  (n = 419), and  $TP53^{TM}$  (n = 254) lung cancers were 77.0%, 30.2%, 24.3%,  
6 16.7%, respectively (**Figure 3 b**). Therefore, the survival rate of lung cancer patients with  $TP53^{WT}$ -  
7 pLoF tumors was dramatically decreased by 61% compared to patients with  $TP53^{WT}$ -pN tumors after  
8 adjusting for demographic variables including sex, age, and smoking status ( $P = 0.016$ , Cox regression).  
9 In contrast, the overall survival of patients with  $TP53^{WT}$ -pLoF tumors showed no difference from that  
10 of patients with  $TP53^{MM}$  or  $TP53^{TM}$  tumors. For the BRCA cohort, 84% (71 out of 85) of the  $TP53^{WT}$ -  
11 pN tumors are classified as Luminal-A subtype, but we did not observe a significant difference in  
12 progression-free survival (PFS) of patients with these tumors. The remaining 15% (13 out of 85) of  
13  $TP53^{WT}$ -pN cases are normal-like breast tumors, among which the  $TP53^{WT}$ -pLoF patients also  
14 exhibited significantly reduced prognosis compared to the  $TP53^{WT}$ -pN group ( $P = 0.017$ , log rank test)  
15 (**Supplementary Figure 7 f**). Normal-like tumors were generally considered as “artifacts” of having  
16 high percentage of normal specimens or slow-growing basal-like tumors (Parker et al., 2009). Our data  
17 indicated the PFS is significantly reduced when p53 is inactivated, thus supporting the normal-like as  
18 a distinct tumor subtype rather than the normal tissue contamination. In summary, in both lung and  
19 breast (normal-like) cancers,  $TP53^{WT}$ -pLoF tumors exhibit a significantly worse prognosis compared  
20 to the  $TP53^{WT}$ -pN tumors.

21  
22 Since p53 plays a prominent role in DNA damage repair (Lane, 1992; Levine, 1997), the p53-defective  
23 cells would accumulate more DNA damages than p53 wild-type cells. To test this hypothesis, we  
24 compared genome and chromosome instability measurements, including TMB, copy number variation  
25 burden, and aneuploidy score, between the  $TP53^{WT}$ -pLoF and  $TP53^{WT}$ -pN groups. We found the

1 genome instabilities were indeed significantly increased in the  $TP53^{WT}$ -pLoF group compared to the  
2  $TP53^{WT}$ -pN group, suggesting deficient DNA damage repair in  $TP53^{WT}$ -pLoF tumors (**Figure 3 c-e**).  
3 Similar trends were observed in the other TCGA cohorts (**Supplementary Table 4**). Hypoxia is a  
4 physiological inducer of p53 (An et al., 1998), and p53 is frequently reported to decrease cell hypoxia  
5 by inhibiting HIF1A activity (Ravi et al., 2000; Sermeus & Michiels, 2011; Yamakuchi et al., 2010).  
6 Consistent with these findings, the Buffa hypoxia score (Buffa, Harris, West, & Miller, 2010) was  
7 significantly lower in the  $TP53^{WT}$ -pN tumors compared to the  $TP53^{WT}$ -pLoF,  $TP53^{MM}$  and  $TP53^{TM}$   
8 tumors (**Figure 3 f**). Collectively, compared to  $TP53^{WT}$ -pN tumors, those  $TP53^{WT}$ -pLoF tumors  
9 resembled the p53 mutant tumors by manifesting significantly worse prognosis, increased genomic  
10 instability, and higher Buffa hypoxia score. These data not only functionally reaffirm our SVM  
11 predictions but also highlight the necessity of re-stratifying the  $TP53$  status determined from the DNA  
12 sequencing.

### 13 **Increased sensitivity of $TP53^{WT}$ -pLoF tumors to chemo-and radiation therapy**

14 The role of mutant p53 in response to chemo-and radiation therapy remains controversial. Mutation in  
15 p53 has been linked to reduced sensitivity to chemo-and radiation therapy (Gurtner et al., 2020;  
16 Hutchinson, Mierzwa, & D'Silva, 2020; J. M. Lee & Bernstein, 1993; Lowe et al., 1994; Skinner et al.,  
17 2012), while other studies showed that p53 inactivation increases tumor's sensitivities to chemo- and  
18 radiation therapy (Bertheau et al., 2002; Bertheau et al., 2007; Concin et al., 2000). Direct comparisons  
19 of radiation or chemotherapy efficacy using TCGA samples are not possible due to the lack of clinical  
20 responsiveness data. Instead, we evaluated the chemo- and radiation sensitivity using previously  
21 published gene signatures (**Supplementary Table 5**) and studied the radiation therapeutic effects with  
22 preclinical animal models. Specifically, chemotherapy sensitivity of lung and breast cancer were  
23 measured by the RPS (recombination proficiency score). The RPS was positively correlated with the  
24 DNA recombination proficiency and was negatively correlated with sensitivity of platinum-based

1 chemotherapy, which was clinically validated in breast cancer and NSCLC patients (Pitroda et al.,  
2 2014). Tumor radiation sensitivity of breast cancers were measured by the RSS (radiation sensitivity  
3 signature) score. RSS score was calculated from the 51-gene signature reported by Speers *et al.* and  
4 also validated in patients (Speers et al., 2015) (see Methods). We found that one gene (*RAD51*) of the  
5 RPS signature and four genes of the RSS signature are overlapped with the p53 targets selected for  
6 LUNG and BRCA (**Supplementary Figure 8 a**). To explore the relationship between predicted p53  
7 status and the radiation therapy (RT) response *in vivo*, we analyzed an independent dataset of 35  
8 patient-derived xenografts (PDX) models that recapitulate many salient genetic and phenotypic  
9 features of glioblastoma (GBM) patients (Vaubel et al., 2020).

10

11 When comparing the RPS score between groups with different p53 statuses in the LUNG cohort, we  
12 found that tumors in the NT group display the highest RPS, while tumors in the *TP53<sup>MM</sup>* and *TP53<sup>TM</sup>*  
13 groups displayed the lowest RPS. Expectedly, the RPS scores of *TP53<sup>WT</sup>*-pN tumors were close to  
14 those of the NT group and were significantly higher than the *TP53<sup>WT</sup>*-pLoF tumors ( $P = 2.8 \times 10^{-9}$ , two-  
15 sided Wilcoxon test). Similar results were observed in the BRCA cohort. Importantly, four BRCA  
16 *TP53<sup>MM</sup>* tumors that were predicted to be p53 normal also had significantly higher RPS scores than  
17 the remaining *TP53<sup>MM</sup>* samples ( $P = 0.029$ , two-sided Wilcoxon test) (**Figure 4 a-b**). The lower RPS  
18 score was linked to increased mutagenesis, adverse clinical features, and inferior patient survival rates,  
19 but such adverse prognosis could be counteracted by adjuvant platinum-based chemotherapy (Pitroda  
20 et al., 2014). Although mutations in *BRCA1/BRCA2* are generally considered to be principal drivers of  
21 homologous recombination deficiency (HRD), strong positive associations between *TP53* mutation  
22 ratio and HRD scores have been observed in TCGA pan-cancer analysis (Takamatsu et al., 2021), and  
23 convergent studies demonstrated the involvement of p53 in regulating homologous recombination  
24 (Gatz & Wiesmuller, 2006; Sengupta & Harris, 2005). These data suggested that platinum-based  
25 chemotherapy is more beneficial to *TP53<sup>WT</sup>*-pLoF tumors than *TP53<sup>WT</sup>*-pN tumors.

1 We calculated radiosensitivity scores after dividing the RSS gene signature into positive (i.e., genes  
2 positively correlated with radiosensitivity) and negative (genes negatively correlated with  
3 radiosensitivity) subsets. We only analyzed the TCGA BRCA cohort since the RSS signature was  
4 derived from breast cancer. Compared to the  $TP53^{WT}$ -pN tumors, RSS scores of  $TP53^{WT}$ -pLoF tumors  
5 were significantly increased when measured by positive genes (**Figure 4 c**), but significantly decreased  
6 when measured by negative genes, suggesting the increased radiosensitivity of  $TP53^{WT}$ -pLoF tumors  
7 (**Figure 4 d**). In contrast, the radiosensitivity of  $TP53^{MM}$ -pN tumors was significantly decreased, as  
8 compared to tumors in the  $TP53^{MM}$ -pLoF tumors (**Figure 4 c-d**). Importantly, we observed similar  
9 results even after removing the genes that overlapped with p53 signature (**Supplementary Figure 8**  
10 **b-e**). Collectively, these results suggest that tumors with the predicted p53 loss-of-function, in  
11 accordance with p53 mutant tumors, are associated with increased sensitivity to platinum-based  
12 chemotherapy and radiation therapy. This is likely because p53 inactivation compromises the DNA  
13 damage repair, and therefore sensitizes tumor cells to chemo and radiation therapies.

14

15 We further confirmed this result using 35 PDX models. We first defined 17 p53-activated and 19 p53-  
16 repressed genes from TCGA GBM cohort (**Supplementary Table 1**). We were unable to train an SVM  
17 model to predict the p53 status, due to the insufficient sample sizes of both normal and tumors  
18 harboring  $TP53$  truncating mutation. Alternatively, we employed the unsupervised clustering to predict  
19 the p53 function status using CES scores calculated from RNA-seq data of PDX mouse models  
20 (**Supplementary Table 6**). To determine the RT responsiveness, we calculated the ratio of median  
21 survival days between the RT group and the placebo group, and PDX models with ratios  $\geq 1.52$  were  
22 considered as RT-responsive (**Figure 4 e, Supplementary Table 6**). Out of 20 PDXs that were  
23 predicted to be LoF, 15 respond to RT. As a comparison, out of 15 PDXs that were predicted to be p53  
24 normal, only 4 are responders. These results indicate RT sensitivity was significantly increased in  
25 pLoF group (Fisher's exact test,  $P = 0.0068$ ) (**Figure 4 f and g**). Although  $TP53$  somatic mutations

1 (determined from WES) were enriched in the pLoF group (**Figure 4 f**), the association between *TP53*  
2 genetic mutation and RT response was not significant (Fisher's exact test,  $P = 0.13$ ). In summary,  
3 these data suggested that our *in silico* predictions successfully uncovered the significant association  
4 between p53 status and RT response, which would be otherwise missed by examining the *TP53* genetic  
5 status alone.

## 6 **Dissecting predicted *TP53*<sup>WT</sup>-pLoF**

7 Next, we sought to explore the potential mechanisms and factors that could explain why most of the  
8 *TP53*<sup>WT</sup> tumors were predicted to be LoF by the SVM model. We investigated the RNA and protein  
9 expression, re-evaluated all the *TP53* missense mutations (reported from WES) by RNA-seq, and  
10 examined the alteration status of p53 upstream regulator MDM2 and MDM4. We did not detect  
11 significant changes in protein abundance between *TP53*<sup>WT</sup>-pN and *TP53*<sup>WT</sup>-pLoF tumors, and *TP53*  
12 RNA expressions were even increased in the *TP53*<sup>WT</sup>-pLoF tumors (**Supplementary Figure 9**, taking  
13 LUNG as an example). This is consistent with previous findings that mutant p53 is associated with  
14 increased *TP53* mRNA expression (Donehower et al., 2019). Also, this result suggests that the  
15 impaired p53 function in the *TP53*<sup>WT</sup>-pLoF group is not likely caused by reduced *TP53* mRNA and  
16 protein abundances.

17  
18 We then reassessed all the *TP53* missense mutations (such as R249 and R273) of *TP53*<sup>WT</sup>-pLoF tumors  
19 using the RNA-seq sequence data of the LUNG and BRCA cohorts. Surprisingly, about 10.3% (32 out  
20 of 310) LUNG and 10.2% (57 out of 561) BRCA *TP53*<sup>WT</sup>-pLoF tumors are genuine p53 mutants as  
21 demonstrated by the large number of RNA-seq reads carrying the mutant alleles (**Supplementary**  
22 **Table 7**). For example, two lung adenocarcinoma samples (TCGA-55-6987 and TCGA-55-8621)  
23 were reported as *TP53*<sup>WT</sup> by TCGA, but the mutant allele fractions (MAF) at 17: g.7577118C>A and  
24 17: g.7577559G>A were 45% (44 out of 98) and 35% (35 out of 100), respectively. It is worth noting

1 that the mutant alleles of these two mutations were also detectable from the WES sequence data albeit  
2 with much fewer supporting reads (2 and 5 reads, respectively), which explains why they were omitted  
3 by the TCGA somatic variant caller (**Supplementary Figure 10**). The significantly increased MAFs  
4 in RNA-seq data is probably due to the preferential expression of the mutant alleles. Interestingly,  
5 compared to the amino acid location of missense mutations reported from WES data, those mutations  
6 identified using RNA-seq data were significantly enriched ( $P = 1.05 \times 10^{-6}$ , two-sided Fisher exact test)  
7 at the p53 R249 position in both lung and breast cancers (**Figure 5 a and b**). The missense mutation  
8 at R249 is generally considered as a structural mutation destabilizing p53 protein due to the altered 3D  
9 structure (Joerger & Fersht, 2016). Also, these mutant tumors rescued from the RNA-seq data  
10 exhibited similar genomic characteristics (tumor mutation burden, copy number variation burden,  
11 aneuploidy score, and Buffa hypoxia score) compared to the  $TP53^{MM}$  and  $TP53^{TM}$  groups  
12 (**Supplementary Figure 11**).

13

14 As p53 negative regulators, MDM2 and its homolog MDMX (encoded by the *MDM4* gene) inhibit  
15 p53 activity via different mechanisms, including transcriptional repression and proteasomal  
16 degradation (Haupt, Maya, Kazaz, & Oren, 1997; Katz et al., 2018; Wasylshen & Lozano, 2016). It  
17 was found that amplification of *MDM2* and/or *MDM4* is mutually exclusive with *TP53* mutations in  
18 lung cancer (odds ratio = 4.32,  $P = 2.2 \times 10^{-16}$ ,  $\chi^2$  test) and breast cancer (odds ratio = 1.46,  $P = 2.0 \times 10^{-16}$ ,  $\chi^2$  test) (**Figure 5 c**). As expected, all of the MDM2 and/or MDM4 amplification samples (LUNG,  $n = 38$ ; BRCA,  $n = 84$ ) were pLoF, and accounted for 12.3% and 15.0% of all  $TP53^{WT}$ -pLoF samples in the LUNG and BRCA cohorts, respectively (**Figure 5 d**).

## 22 Conclusion

23 In this study, we defined p53 transcriptional targets and calculated their CES as a surrogate measure  
24 of p53 activity, trained and validated SVM models using CES from NT and TM groups, which

1 represented p53-normal and p53-LoF, respectively. We demonstrated that p53 status could be  
2 accurately predicted using *in silico* approach, and showed that non-mutational p53 inactivation is  
3 pervasive in human malignancies. Our analyses further revealed that the predicted  $TP53^{WT}$ -pLoF  
4 tumors exhibited a similar level of genomic instability as those with genetic inactivation—including  
5 significantly increased mutations, copy number alterations, and aneuploidy. Similar to p53 mutants,  
6 those patients with  $TP53^{WT}$ -pLoF tumors had much worse overall survival than those with  $TP53^{WT}$ -  
7 pN tumors, highlighting the prognostic value of our prediction. When evaluated using clinically  
8 validated signatures,  $TP53^{WT}$ -pLoF tumors exhibited significantly increased sensitivity to platinum-  
9 based chemotherapy and radiation therapy. This observation was confirmed in our GBM preclinical  
10 animal models. Finally,  $TP53^{WT}$ -pLoF could be partially explained by false negative mutation calls,  
11 or *MDM2* and *MDM4* amplifications.

## 12 Discussion

13 Genomic instability, self-sufficiency in terms of growth signals, insensitivity to anti-growth signals,  
14 and evasion of programmed cell death are hallmarks of cancer (Hanahan & Weinberg, 2000). These  
15 biological processes are orchestrated by oncogenes (e.g., *EGFR*, *PIK3A*, and *KRAS*) and tumor  
16 suppressor genes (e.g., *TP53*, *RBI*, *PTEN*, and *CDKN2A*). During tumorigenesis, genomic  
17 amplification (or copy gain) and missense mutation are observed in oncogenes, while genomic deletion  
18 (or copy loss), non-sense, and frameshift mutations are associated with tumor suppressor genes (Soussi  
19 & Wiman, 2015). Indeed, *RBI*, *PTEN*, and *CDKN2A* are generally inactivated by homozygous  
20 deletions, which directly leads to little or no protein expression (**Supplementary Figure 12**). Unlike  
21 other tumor suppressors, the predominant genomic alteration for *TP53* is missense mutation, which  
22 leads to an altered or faulty protein (**Supplementary Figure 12**). In addition, multiple lines of evidence  
23 have characterized the oncogenic role of mutant p53 (Govindan & Weber, 2014), including the over-  
24 expression in p53 mutants, accumulation of mutant p53 protein in the nucleus and the cytoplasm, as



1 well as functional studies *in vivo* and *in vitro* systems (Biegging, Mello, & Attardi, 2014; Freed-Pastor  
2 & Prives, 2012; Hollstein, Sidransky, Vogelstein, & Harris, 1991; Oren & Rotter, 2010). The primary  
3 goal of this study is to investigate the loss of p53's tumor suppressor function in tumors that may be  
4 thought to be p53 functionally normal due to lack of *TP53* genetic alterations. First, our selected p53  
5 target genes are highly enriched in cell division, cell cycle control, DNA integrity checkpoint, and  
6 DNA damage repair pathways (**Supplementary Figure 2 b**). Second, we trained SVM models using  
7 normal tissues and tumor samples with truncating *TP53* mutations that result in shortened protein.  
8 Therefore, those *TP53* missense mutations that were predicted to be LoF (*TP53*<sup>MM</sup>-pLoF) should be  
9 interpreted as the “loss of p53's tumor suppressor function”. We could not rule out the possibilities  
10 that the mutant p53 protein in the *TP53*<sup>MM</sup>-pLoF sample have gained oncogenic functions.

11

12 According to our analyses, among *TP53*<sup>WT</sup> tumors that were predicted to be LoF (*TP53*<sup>WT</sup>-pLoF), 22-  
13 25% could be explained by false-negatives (i.e., *TP53* mutations that failed to be detected from the  
14 WES assay) or *MDM2* and *MDM4* amplification. However, the underpinning mechanisms for the  
15 remaining 75-78% are unknown and warrant further investigation. We analyzed the DNA methylation  
16 data generated from the Infinium HumanMethylation450 BeadChip array, but did not detect significant  
17 differences between *TP53*<sup>WT</sup>-pLoF and *TP53*<sup>WT</sup>-pN tumors among all nine CpG sites that mapped to  
18 *TP53* (cg02087342, cg06365412, cg10792831, cg12041075, cg12041429, cg13468400, cg16397722,  
19 cg18198734, cg22949073). Presumably, p53 function is compromised by other transcriptional, post-  
20 transcriptional and post-translational mechanisms (Bode & Dong, 2004; Dai & Gu, 2010). For those  
21 *TP53*<sup>WT</sup> samples that were predicted to be p53 normal, we did not detect significant differences in  
22 tumor purities (measured by IHC) between *TP53*<sup>WT</sup>-pN and other tumor samples in LUNG ( $P = 0.460$ ,  
23 Wilcoxon rank sum test) and BRCA cohorts ( $P = 0.066$ , Wilcox rank sum test), suggesting that these  
24 *TP53*<sup>WT</sup>-pN tumors are not attributed to lower tumor cellularity. We also observed four *TP53*<sup>MM</sup>  
25 samples that were predicted to be p53 normal from the BRCA cohort, including TCGA-E2-A1B1,

1 TCGA-LD-A74U, TCGA-BH-A1FE, and TCGA-EW-A1P1 (**Supplementary Table 8 c**). All  
2 reported mutations from these four samples could be confirmed from RNA-seq alignments with high  
3 mutant allele frequencies, which rules out the possibility of false positives or cross-sample  
4 contaminations. The potential reasons remain unclear, and the limited sample size precludes systematic  
5 evaluations.

6  
7 Gene expression reflects the downstream effects of transcriptional regulation. This study demonstrated  
8 that composite expression calculated from a group of logically connected genes is a reliable measure  
9 of the activity of their common upstream regulator. A large number of truncating mutations in *TP53*,  
10 providing a reliable way to identify loss of function cases, made this analysis particularly approachable.  
11 When obtaining sufficient training data is not practical, unsupervised machine-learning approaches  
12 such as K-means clustering, semi-supervised learning, principal component analysis (PCA), and neural  
13 networks could be used as an alternative to the SVM model.

14  
15 *TP53* is the most mutated gene in human cancers. Our analyses further revealed that most *TP53*<sup>WT</sup>  
16 tumors are genetically normal but phenotypically deficient in p53 function. This finding demonstrates  
17 an inherent limitation in the stratification and segmentation of patients based on DNA markers alone  
18 and encourages the development of “ensemble” approaches based on genomic, epigenomic,  
19 transcriptomic and proteomic data.

## 20 **Materials and Methods**

### 21 **Data collection**

22 We downloaded somatic mutation data for *TP53* from the LUNG (LUSC + LUAD), BRCA, COAD,  
23 ESCA, BLCA, HNSC, LIHC, STAD, and UCES datasets on cBioPortal (<https://www.cbioportal.org/>)

1 along with pre-calculated meta scores including the fraction of genome altered (FGA), mutation count,  
2 aneuploidy score, and Buffa hypoxia score. TCGA WES and RNA-seq BAM files for BRCA and  
3 LUNG were downloaded from the GDC data portal (<https://portal.gdc.cancer.gov/>), which were used  
4 to re-evaluate p53 mutation status. TCGA level-3 RNA-seq expression data of selected cancers and  
5 the corresponding demographic and survival data were downloaded from the University of California  
6 Santa Cruz's Xena web server (<https://xena.ucsc.edu/>). Pre-calculated raw RNA-seq read counts were  
7 used to identify differentially expressed genes between the NT and TM groups, log<sub>2</sub>-transformed  
8 FPKM (i.e., Fragments Per Kilobase of exon per Million mapped fragments) was used to calculate  
9 CES scores, and TPM (i.e., Transcript Per Million) was used to calculate GSVA to evaluate chemo-  
10 and radiotherapy sensitivities. ChIP-seq data (p53 binding peaks) were downloaded from the ReMap  
11 2020 database (Cheneby et al., 2020) (<https://remap.univ-amu.fr/>). Gene expression data (TPM) of  
12 normal tissues were downloaded from the GTEx (release V8) data portal (<https://gtexportal.org/home/>).

### 13 **Identification of p53 target genes across different cancer types**

14 To identify p53 targets for each cancer type, we employed a series of steps. First, we started with 147  
15 genes that have been experimentally validated as p53 targets, including 116 genes activated by p53  
16 and 31 genes repressed by p53 (Fischer, 2017). We further analyzed the publicly available ChIP-seq  
17 data from ReMap 2020 (Cheneby et al., 2020) and found that 99% of the p53 target genes from the  
18 Fischer *et al.* study have at least one p53 peak within the promotor region, which is defined as +/- 1  
19 kb around the transcription start site (TSS). The basal level expression of p53 targets in normal tissues  
20 was evaluated using the GTEx (Consortium, 2015) RNA-seq data. Specifically, we first calculated the  
21 median TPM across all samples in each tissue type, and then calculated the mean of median TPMs  
22 across all tissue types. The result showed that the mean of median TPMs of each p53 target gene was >  
23 1 TPM, indicating that these 147 p53 targets were reliably expressed across GTEx normal tissues and  
24 thus were included in our downstream analyses.

1

2 Since p53 might regulate a specific set of genes in different cancer types (Fischer, 2017), and to define  
3 cancer-specific p53 targets, we first performed differential expression analysis in each cancer by  
4 comparing the NT group (considered to be p53 functionally normal) to the TM group (considered to  
5 be p53 functionally impaired). Note, samples assigned to the testing set were not used for the  
6 differential expression analysis. Then, the differentially expressed genes (adjusted  $p$ -value  $< 0.05$  and  
7  $|\text{fold change}| > 2$ ) were intersected with the 147 genes defined previously. We defined p53-activated  
8 and p53-repressed genes as those downregulated and upregulated in the TM group, respectively. The  
9 differential analyses were conducted using the R package DESeq2 on the raw RNA-seq reads counts  
10 (Love, Huber, & Anders, 2014).

## 11 **Computation of composite expression scores**

12 CES is a single enrichment score that provides intuitive and stable measurement of p53 activity in each  
13 cancer. We used four algorithms to calculate the CES including (1) Gene Set Variation Analysis  
14 (GSVA), a gene set enrichment method that estimates variation of pathway activity over a sample  
15 population in an unsupervised manner (Hanzelmann et al., 2013); (2) single-sample GSEA (ssGSEA),  
16 an extension of GSEA, which calculates separate enrichment scores for each pairing of a sample and  
17 gene set (Barbie et al., 2009); (3) The first Principal Component (PC1) score of the principal  
18 component analysis (PCA); and (4) combined Z-score, a normalized value based on the mean and  
19 standard deviation (E. Lee et al., 2008; Tomfohr et al., 2005). To calculate the combined Z-score, gene  
20 expression values ( $\log_2(\text{FPKM})$ ) of each sample were converted into Z-scores by  $Z = (x - \mu)/\sigma$ , where  
21  $\mu$  and  $\sigma$  is the average and standard deviation of  $\log_2(\text{FPKM})$  across all samples of a gene. Given a  
22 gene set  $\gamma = \{1, \dots, k\}$  with standardized values  $z_1, \dots, z_k$  for each gene in a specific sample, the combined  
23 Z-score  $Z_\gamma$  for the gene set  $\gamma$  is defined as:

$$Z_{\gamma} = \frac{\sum_{i=1}^k Z_i}{\sqrt{k}}$$

1

2

3 GSVA, ssGSEA, and Z-score were calculated for p53 activated and repressed targets separately, while  
4 PC1 was calculated using all p53 targets, which resulted in a total of seven CES scores for each sample.  
5 The GSVA package (<https://www.bioconductor.org/packages/release/bioc/html/GSVA.html>) was  
6 used to compute GSVA, ssGSEA, and Z-score. The Python package sklearn ([https://scikit-  
7 learn.org/stable/](https://scikit-learn.org/stable/)) was used to perform PCA analyses.

## 8 **Training and evaluating the performance of SVM models**

9 Since the prediction of p53 status is a binary classification, we chose to use the SVM model—a widely  
10 used, supervised machine-learning method. SVM models with linear kernel were trained using the  
11 CES scores of NT (normal tissue, coded as “0”) and TM (truncating mutations, coded as “1”) groups.  
12 GridSearch was used to pick the proper C and gamma parameters for the SVM model. We used TCGA  
13 data for both training and testing; no separate or external validation set was used. The number of  
14 samples available for training/testing depended on the cancer type. The number of training and testing  
15 samples (n) were 362, 246, 99, 64, and 1335 for the LUNG, BRCA, COAD, ESCA, and pan-cancer  
16 cohorts, respectively (**Supplementary Table 8 a**). A total of seven features (GSVA<sub>activated</sub>,  
17 GSVA<sub>repressed</sub>, ssGSEA<sub>activated</sub>, ssGSEA<sub>repressed</sub>, Zscore<sub>activated</sub>, Zscore<sub>repressed</sub>, and PC1) were used in the  
18 SVM models. Therefore,  $p \ll n$  for all SVM models built in this study, where  $p$  represents the number  
19 of features (predictor variables) and  $n$  represents the number of samples.

20

21 We applied ten-fold cross-validation to evaluate the performance of the SVM model. Specifically, we  
22 used the “*train\_test\_split*” function from the “*sklearn.model\_selection*” class to split the samples (i.e,  
23 NT and TM samples) into training set (75%) and testing set (25%). We performed the differential

1 expression for gene selection and trained the SVM models with the training set, and then used the  
2 testing set to evaluate the performance. This enforced that the training and test sets were independent.  
3 In each iteration, a confusion matrix was made, and performance measurements (i.e., sensitivity/recall,  
4 precision, accuracy) were calculated. Finally, we summarized the performance of models with the  
5 mean of the measurement scores and the ROC (receiver operating characteristic) curves. The  
6 performance measurements are defined as below:

$$\text{recall} = \frac{\text{TP}}{\text{TP} + \text{FN}}$$

$$\text{precision} = \frac{\text{TP}}{\text{TP} + \text{FP}}$$

$$\text{accuracy} = \frac{\text{TP} + \text{TN}}{\text{TP} + \text{TN} + \text{FP} + \text{FN}}$$

$$\text{F1} = \frac{2}{\text{recall}^{-1} + \text{precision}^{-1}}$$

12 Where FN = false negative; FP = false positive; TN = true negative; TP = true positive. We used the  
13 Scikit-learn ([www.scikit-learn.org](http://www.scikit-learn.org)) Python package for SVM modeling and ten-fold cross-validation.  
14 We used pandas (<https://pandas.pydata.org/>), numpy (<https://numpy.org/>), and scipy  
15 (<https://www.scipy.org/>) for data processing and numerical analyses. Details of SVM models are  
16 available in **Supplementary Table 9**. All TCGA barcodes (i.e., sample identifiers) for training and  
17 testing used in this study are listed in **Supplementary Table 8 b-f**. Python source code is available  
18 from <https://github.com/liguowang/epage>.

### 19 **Re-evaluation of *TP53* mutation status using RNA-seq**

20 The genomic locations of *TP53* somatic mutations in LUNG and BRCA samples were downloaded  
21 from the cBioPortal (<https://www.cbioportal.org/>). The reference and mutant allele counts were then  
22 calculated from the RNA-seq BAM file using Samtools' pileup engine and an in-house Python script

1 (Li et al., 2009). The samples with fewer than 10 read counts at a given genome site were discarded  
2 (n=41), and a cut-off of minor allele frequency = 0.1 was employed to determine the genotype. A  
3 sample was determined as *TP53* mutated if there are at least five high-quality reads (Phred-scaled  
4 sequencing quality and mapping quality > 30) supporting the mutant allele. 32 and 57 *TP53*<sup>WT</sup> samples  
5 met this criterion in LUNG and BRCA samples, respectively. The Integrative Genomics Viewer (IGV)  
6 was used to manually inspect the variants and visualize the alignments.

### 7 **Investigation of two independent treatment-related signatures**

8 Tumor chemotherapy sensitivity (i.e., RPS score) was estimated from the 4 genes involved in DNA  
9 repair (*RIF1*, *PARI/F2R*, *RAD51*, and *Ku80/XRCC5*) reported by Pitroda *et al.* (Pitroda et al., 2014).  
10 Tumor radiation sensitivity signature (RSS) scores in breast cancer were calculated from the 51-gene  
11 signature reported by Speers *et al.* (Speers et al., 2015), and the genes were divided in to “positive”  
12 and “negative” groups according to the correlation between their expression level and radiation  
13 sensitivity. The R package GSVA (Hanzelmann et al., 2013) was used to calculate the RPS and RSS  
14 scores. Specifically, according to the study of Pitroda *et al.*, the original RPS was defined as the sum  
15 of the expression levels times -1 after log<sub>2</sub> transformation and Robust Multi-array Average (RMA)-  
16 normalization. In this study, RPS was represented by -GSVA of TPM.

### 17 **GBM derived xenografts**

18 Glioblastoma patient-derived xenografts (PDX) were generated by the Mayo PDX National Resource  
19 (Vaubel et al., 2020). Mice with established orthotopic tumors were randomized in groups of 5–10  
20 mice and treated with placebo and radiation therapy (RT). To determine the RT responsiveness of  
21 PDX, we first calculate the ratio of median survivals between the RT group and placebo group. A  
22 cutoff value (1.52) was determined as the changing point on the non-parametric kernel density curve  
23 **(Supplementary Table 6)**.

1

2 DNA (WES) and RNA (RNA-seq) sequencing were performed by Mayo Clinic medical genomic  
3 facility or Translational Genomics Institute (TGen) using the SureSelect (Agilent, Santa Clara, CA) or  
4 TGen Strexome V2 capture kits. Raw sequencing reads were aligned to both human (hg38) and mouse  
5 (mm10) reference genomes to remove any reads potentially originated from the mouse tissue. Then,  
6 filtered WES and RNA-seq data were analyzed using Mayo's MAP-RSeq and GenomeGPS workflow,  
7 respectively. The raw sequencing data were submitted to the NCBI Sequence Read Archive with  
8 accession # PRJNA543854 and PRJNA548556 for WES and RNA-seq, respectively. Annotated  
9 genomic and transcriptomic data are also publicly accessible through the cBioPortal  
10 ([https://www.cbioportal.org/study/summary?id=gbm\\_mayo\\_pdx\\_sarkaria\\_2019](https://www.cbioportal.org/study/summary?id=gbm_mayo_pdx_sarkaria_2019)).

## 11 **Declarations**

## 12 **Ethics approval and consent to participate**

13 Not applicable

## 14 **Consent for publication**

15 Not applicable

## 16 **Availability of data and materials**

17 We downloaded somatic mutation data for *TP53* from the LUNG (LUSC + LUAD), BRCA, COAD,  
18 ESCA, BLCA, HNSC, LIHC, STAD, and UCES datasets on cBioPortal (<https://www.cbioportal.org/>)  
19 along with pre-calculated meta scores including the fraction of genome altered (FGA), mutation count,  
20 aneuploidy score, and Buffa hypoxia score. TCGA WES and RNA-seq BAM files for BRCA and  
21 LUNG were downloaded from the GDC data portal (<https://portal.gdc.cancer.gov/>), which were used  
22 to re-evaluate p53 mutation status. TCGA level-3 RNA-seq expression data of selected cancers and



1 the corresponding demographic and survival data were downloaded from the University of California  
2 Santa Cruz's Xena web server (<https://xena.ucsc.edu/>). Pre-calculated raw RNA-seq read counts were  
3 used to identify differentially expressed genes between the NT and TM groups, log<sub>2</sub>-transformed  
4 FPKM (i.e., Fragments Per Kilobase of exon per Million mapped fragments) was used to calculate  
5 CES scores, and TPM (i.e., Transcript Per Million) was used to calculate GSVA to evaluate chemo-  
6 and radiotherapy sensitivities. ChIP-seq data (p53 binding peaks) were downloaded from the ReMap  
7 2020 database (Cheneby et al., 2020) (<https://remap.univ-amu.fr/>). Gene expression data (TPM) of  
8 normal tissues were downloaded from the GTEx (release V8) data portal (<https://gtexportal.org/home/>).  
9 All of the results generated in this study are included as supplementary data sets (supplementary table  
10 1-8).

11

12 Python source code of our p53 status prediction method is available from  
13 <https://github.com/liguowang/epage>.

#### 14 **Competing interests**

15 The authors declare no competing interests.

#### 16 **Funding**

17 This work is partially supported by the US National Institute of Health [U10-CA180882-07], the  
18 Center for Individualized Medicine of Mayo Clinic, the Strategic Priority Research Program of the  
19 Chinese Academy of Sciences [XDB38030400], and the Youth Innovation Promotion Association of  
20 Chinese Academy of Sciences [2019104].

#### 21 **Author's Contributions**

22 L.W., L.M., and H.L. conceived the study. Q.L. and Y.Z. implemented the SVM model and performed  
23 the bioinformatics analyses. Z.Z., A.O., J.N.K., and D.E.K. assisted and supervised model building

1 and analysis. L.W., L.M., Q.L., and Y.Z. took the lead in writing the manuscript. All authors provided  
2 critical feedback and helped shape the research, analyses, and manuscript.

3

#### 4 **Acknowledgments**

5 The results shown in this study are in part based upon data generated by the TCGA Research Network  
6 (<https://www.cancer.gov/tcga>). We thank TCGA's specimen donors and research groups that make  
7 genomic data publicly available.

8

## 1 **Abbreviations**

- 2 AUROC, area under the receiver operating characteristic
- 3 BAM, binary version of SAM (Sequence Alignment/Map) file
- 4 BRCA, breast invasive carcinoma
- 5 CES, composite expression score
- 6 ChIP-seq, chromatin immunoprecipitation sequencing
- 7 COAD, colon adenocarcinoma
- 8 ESCA, esophageal carcinoma
- 9 FGA, fraction of genome altered
- 10 FN, false negative
- 11 FP, false positive
- 12 FPKM, Fragments Per Kilobase of exon per Million mapped fragments
- 13 GoF, gain of function
- 14 GSVA, gene set variation analysis
- 15 GTE<sub>x</sub>, genotype-tissue expression
- 16 HNSC, head and neck squamous cell carcinoma
- 17 HRD, homologous recombination deficiency
- 18 ICGC, International Cancer Genome Consortium
- 19 IHC, immuno histochemistry staining
- 20 LIHC, liver hepatocellular carcinoma
- 21 LoF, loss of function
- 22 MM, missense mutation
- 23 MAF, mutant allele fractions
- 24 NSCLS, non-small cell lung carcinomas
- 25 NT, normal tissue
- 26 OR, odds ratio
- 27 PCA, principal component analysis
- 28 PDX, patient derived xenografts
- 29 ROC, receiver operating characteristic
- 30 RPS, recombination proficiency score
- 31 RSS, radiation sensitivity signature
- 32 ssGSEA, single sample gene set enrichment analysis
- 33 STAD, stomach adenocarcinoma
- 34 SVM, support vector machine
- 35 TCGA, The Cancer Genome Atlas
- 36 TPM, transcript per million
- 37 TM, truncating mutation
- 38 TMB, tumor mutation burden
- 39 TN, true negative
- 40 TP, true positive
- 41 UCES, uterine corpus endometrial carcinoma
- 42 WES, whole exome sequencing
- 43 WT, wildtype

## 1 Reference

- 2
- 3 Agirre, X., Vizmanos, J. L., Calasanz, M. J., Garcia-Delgado, M., Larrayoz, M. J., & Novo, F. J. (2003). Methylation of CpG  
4 dinucleotides and/or CCWGG motifs at the promoter of TP53 correlates with decreased gene expression in a  
5 subset of acute lymphoblastic leukemia patients. *Oncogene*, *22*(7), 1070-1072. doi:10.1038/sj.onc.1206236
- 6 Alexandrov, L. B., Nik-Zainal, S., Wedge, D. C., Aparicio, S. A., Behjati, S., Biankin, A. V., . . . Stratton, M. R. (2013).  
7 Signatures of mutational processes in human cancer. *Nature*, *500*(7463), 415-421. doi:10.1038/nature12477
- 8 An, W. G., Kanekal, M., Simon, M. C., Maltepe, E., Blagosklonny, M. V., & Neckers, L. M. (1998). Stabilization of wild-  
9 type p53 by hypoxia-inducible factor 1alpha. *Nature*, *392*(6674), 405-408. doi:10.1038/32925
- 10 Ashcroft, M., Kubbutat, M. H., & Vousden, K. H. (1999). Regulation of p53 function and stability by phosphorylation.  
11 *Mol Cell Biol*, *19*(3), 1751-1758. doi:10.1128/MCB.19.3.1751
- 12 Barbie, D. A., Tamayo, P., Boehm, J. S., Kim, S. Y., Moody, S. E., Dunn, I. F., . . . Hahn, W. C. (2009). Systematic RNA  
13 interference reveals that oncogenic KRAS-driven cancers require TBK1. *Nature*, *462*(7269), 108-112.  
14 doi:10.1038/nature08460
- 15 Bertheau, P., Plassa, F., Espie, M., Turpin, E., de Roquancourt, A., Marty, M., . . . de The, H. (2002). Effect of mutated  
16 TP53 on response of advanced breast cancers to high-dose chemotherapy. *Lancet*, *360*(9336), 852-854.  
17 doi:10.1016/S0140-6736(02)09969-5
- 18 Bertheau, P., Turpin, E., Rickman, D. S., Espie, M., de Reynies, A., Feugeas, J. P., . . . de The, H. (2007). Exquisite  
19 sensitivity of TP53 mutant and basal breast cancers to a dose-dense epirubicin-cyclophosphamide regimen.  
20 *PLoS Med*, *4*(3), e90. doi:10.1371/journal.pmed.0040090
- 21 Biegging, K. T., Mello, S. S., & Attardi, L. D. (2014). Unravelling mechanisms of p53-mediated tumour suppression. *Nat*  
22 *Rev Cancer*, *14*(5), 359-370. doi:10.1038/nrc3711
- 23 Bode, A. M., & Dong, Z. (2004). Post-translational modification of p53 in tumorigenesis. *Nat Rev Cancer*, *4*(10), 793-805.  
24 doi:10.1038/nrc1455
- 25 Bosari, S., Viale, G., Roncalli, M., Graziani, D., Borsani, G., Lee, A. K., & Coggi, G. (1995). p53 gene mutations, p53 protein  
26 accumulation and compartmentalization in colorectal adenocarcinoma. *Am J Pathol*, *147*(3), 790-798.
- 27 Bouvard, V., Zaitchouk, T., Vacher, M., Duthu, A., Canivet, M., Choisy-Rossi, C., . . . May, E. (2000). Tissue and cell-  
28 specific expression of the p53-target genes: bax, fas, mdm2 and waf1/p21, before and following ionising  
29 irradiation in mice. *Oncogene*, *19*(5), 649-660. doi:10.1038/sj.onc.1203366
- 30 Bryant, H. E., Schultz, N., Thomas, H. D., Parker, K. M., Flower, D., Lopez, E., . . . Helleday, T. (2005). Specific killing of  
31 BRCA2-deficient tumours with inhibitors of poly(ADP-ribose) polymerase. *Nature*, *434*(7035), 913-917.  
32 doi:10.1038/nature03443
- 33 Buffa, F. M., Harris, A. L., West, C. M., & Miller, C. J. (2010). Large meta-analysis of multiple cancers reveals a common,  
34 compact and highly prognostic hypoxia metagene. *Br J Cancer*, *102*(2), 428-435. doi:10.1038/sj.bjc.6605450
- 35 Burns, T. F., Bernhard, E. J., & El-Deiry, W. S. (2001). Tissue specific expression of p53 target genes suggests a key role  
36 for KILLER/DR5 in p53-dependent apoptosis in vivo. *Oncogene*, *20*(34), 4601-4612. doi:10.1038/sj.onc.1204484
- 37 Cheneby, J., Menetrier, Z., Mestdagh, M., Rosnet, T., Douida, A., Rhalloussi, W., . . . Ballester, B. (2020). ReMap 2020: a  
38 database of regulatory regions from an integrative analysis of Human and Arabidopsis DNA-binding sequencing  
39 experiments. *Nucleic Acids Res*, *48*(D1), D180-D188. doi:10.1093/nar/gkz945
- 40 Concin, N., Zeillinger, C., Stimpfel, M., Schiebel, I., Tong, D., Wolff, U., . . . Zeillinger, R. (2000). p53-dependent  
41 radioresistance in ovarian carcinoma cell lines. *Cancer Lett*, *150*(2), 191-199. doi:10.1016/s0304-  
42 3835(99)00393-6
- 43 Consortium, G. T. (2015). Human genomics. The Genotype-Tissue Expression (GTEx) pilot analysis: multitissue gene  
44 regulation in humans. *Science*, *348*(6235), 648-660. doi:10.1126/science.1262110
- 45 Cortez, M. A., Ivan, C., Valdecanas, D., Wang, X., Peltier, H. J., Ye, Y., . . . Welsh, J. W. (2016). PDL1 Regulation by p53 via  
46 miR-34. *J Natl Cancer Inst*, *108*(1). doi:10.1093/jnci/djv303
- 47 Cross, B., Chen, L., Cheng, Q., Li, B., Yuan, Z. M., & Chen, J. (2011). Inhibition of p53 DNA binding function by the MDM2  
48 protein acidic domain. *J Biol Chem*, *286*(18), 16018-16029. doi:10.1074/jbc.M111.228981
- 49 Dai, C., & Gu, W. (2010). p53 post-translational modification: deregulated in tumorigenesis. *Trends Mol Med*, *16*(11),  
50 528-536. doi:10.1016/j.molmed.2010.09.002
- 51 Donehower, L. A., Soussi, T., Korkut, A., Liu, Y., Schultz, A., Cardenas, M., . . . Wheeler, D. A. (2019). Integrated Analysis  
52 of TP53 Gene and Pathway Alterations in The Cancer Genome Atlas. *Cell Rep*, *28*(5), 1370-1384 e1375.  
53 doi:10.1016/j.celrep.2019.07.001

- 1 Farmer, H., McCabe, N., Lord, C. J., Tutt, A. N., Johnson, D. A., Richardson, T. B., . . . Ashworth, A. (2005). Targeting the  
2 DNA repair defect in BRCA mutant cells as a therapeutic strategy. *Nature*, *434*(7035), 917-921.  
3 doi:10.1038/nature03445
- 4 Fischer, M. (2017). Census and evaluation of p53 target genes. *Oncogene*, *36*(28), 3943-3956.  
5 doi:10.1038/onc.2016.502
- 6 Freed-Pastor, W. A., & Prives, C. (2012). Mutant p53: one name, many proteins. *Genes Dev*, *26*(12), 1268-1286.  
7 doi:10.1101/gad.190678.112
- 8 Gatz, S. A., & Wiesmuller, L. (2006). p53 in recombination and repair. *Cell Death Differ*, *13*(6), 1003-1016.  
9 doi:10.1038/sj.cdd.4401903
- 10 Glodzik, D., Bosch, A., Hartman, J., Aine, M., Vallon-Christersson, J., Reutersward, C., . . . Staaf, J. (2020). Comprehensive  
11 molecular comparison of BRCA1 hypermethylated and BRCA1 mutated triple negative breast cancers. *Nat*  
12 *Commun*, *11*(1), 3747. doi:10.1038/s41467-020-17537-2
- 13 Gogna, R., Madan, E., Kuppusamy, P., & Pati, U. (2012). Re-oxygenation causes hypoxic tumor regression through  
14 restoration of p53 wild-type conformation and post-translational modifications. *Cell Death Dis*, *3*, e286.  
15 doi:10.1038/cddis.2012.15
- 16 Gorkin, D. U., Leung, D., & Ren, B. (2014). The 3D genome in transcriptional regulation and pluripotency. *Cell Stem Cell*,  
17 *14*(6), 762-775. doi:10.1016/j.stem.2014.05.017
- 18 Govindan, R., & Weber, J. (2014). TP53 mutations and lung cancer: not all mutations are created equal. *Clin Cancer Res*,  
19 *20*(17), 4419-4421. doi:10.1158/1078-0432.CCR-14-0899
- 20 Guo, G., Yu, M., Xiao, W., Celis, E., & Cui, Y. (2017). Local Activation of p53 in the Tumor Microenvironment Overcomes  
21 Immune Suppression and Enhances Antitumor Immunity. *Cancer Res*, *77*(9), 2292-2305. doi:10.1158/0008-  
22 5472.CAN-16-2832
- 23 Gurtner, K., Kryzmien, Z., Koi, L., Wang, M., Benes, C. H., Hering, S., . . . Krause, M. (2020). Radioresistance of  
24 KRAS/TP53-mutated lung cancer can be overcome by radiation dose escalation or EGFR tyrosine kinase  
25 inhibition in vivo. *Int J Cancer*, *147*(2), 472-477. doi:10.1002/ijc.32598
- 26 Hafner, A., Stewart-Ornstein, J., Purvis, J. E., Forrester, W. C., Bulyk, M. L., & Lahav, G. (2017). p53 pulses lead to distinct  
27 patterns of gene expression albeit similar DNA-binding dynamics. *Nat Struct Mol Biol*, *24*(10), 840-847.  
28 doi:10.1038/nsmb.3452
- 29 Hanahan, D., & Weinberg, R. A. (2000). The hallmarks of cancer. *Cell*, *100*(1), 57-70. doi:10.1016/s0092-8674(00)81683-  
30 9
- 31 Hanzelmann, S., Castelo, R., & Guinney, J. (2013). GSEA: gene set variation analysis for microarray and RNA-seq data.  
32 *BMC Bioinformatics*, *14*, 7. doi:10.1186/1471-2105-14-7
- 33 Haupt, Y., Maya, R., Kazaz, A., & Oren, M. (1997). Mdm2 promotes the rapid degradation of p53. *Nature*, *387*(6630),  
34 296-299. doi:10.1038/387296a0
- 35 Hollstein, M., Sidransky, D., Vogelstein, B., & Harris, C. C. (1991). p53 mutations in human cancers. *Science*, *253*(5015),  
36 49-53. doi:10.1126/science.1905840
- 37 Hutchinson, M. N. D., Mierzwa, M., & D'Silva, N. J. (2020). Radiation resistance in head and neck squamous cell  
38 carcinoma: dire need for an appropriate sensitizer. *Oncogene*, *39*(18), 3638-3649. doi:10.1038/s41388-020-  
39 1250-3
- 40 Igelmann, S., Neubauer, H. A., & Ferbeyre, G. (2019). STAT3 and STAT5 Activation in Solid Cancers. *Cancers (Basel)*,  
41 *11*(10). doi:10.3390/cancers11101428
- 42 Isaacs, J. S., Hardman, R., Carman, T. A., Barrett, J. C., & Weissman, B. E. (1998). Differential subcellular p53 localization  
43 and function in N- and S-type neuroblastoma cell lines. *Cell Growth Differ*, *9*(7), 545-555.
- 44 Jia, P., & Zhao, Z. (2019). Characterization of Tumor-Suppressor Gene Inactivation Events in 33 Cancer Types. *Cell Rep*,  
45 *26*(2), 496-506 e493. doi:10.1016/j.celrep.2018.12.066
- 46 Jiang, C., & Pugh, B. F. (2009). Nucleosome positioning and gene regulation: advances through genomics. *Nat Rev*  
47 *Genet*, *10*(3), 161-172. doi:10.1038/nrg2522
- 48 Joerger, A. C., & Fersht, A. R. (2016). The p53 Pathway: Origins, Inactivation in Cancer, and Emerging Therapeutic  
49 Approaches. *Annu Rev Biochem*, *85*, 375-404. doi:10.1146/annurev-biochem-060815-014710
- 50 Karsli Uzunbas, G., Ahmed, F., & Sammons, M. A. (2019). Control of p53-dependent transcription and enhancer activity  
51 by the p53 family member p63. *J Biol Chem*, *294*(27), 10720-10736. doi:10.1074/jbc.RA119.007965
- 52 Karve, T. M., & Cheema, A. K. (2011). Small changes huge impact: the role of protein posttranslational modifications in  
53 cellular homeostasis and disease. *J Amino Acids*, *2011*, 207691. doi:10.4061/2011/207691
- 54 Kato, S., Han, S. Y., Liu, W., Otsuka, K., Shibata, H., Kanamaru, R., & Ishioka, C. (2003). Understanding the function-  
55 structure and function-mutation relationships of p53 tumor suppressor protein by high-resolution missense  
56 mutation analysis. *Proc Natl Acad Sci U S A*, *100*(14), 8424-8429. doi:10.1073/pnas.1431692100

- 1 Katz, C., Low-Calle, A. M., Choe, J. H., Laptenko, O., Tong, D., Joseph-Chowdhury, J. N., . . . Prives, C. (2018). Wild-type  
2 and cancer-related p53 proteins are preferentially degraded by MDM2 as dimers rather than tetramers. *Genes*  
3 *Dev*, 32(5-6), 430-447. doi:10.1101/gad.304071.117
- 4 Lane, D. P. (1992). Cancer. p53, guardian of the genome. *Nature*, 358(6381), 15-16. doi:10.1038/358015a0
- 5 Lee, E., Chuang, H. Y., Kim, J. W., Ideker, T., & Lee, D. (2008). Inferring pathway activity toward precise disease  
6 classification. *PLoS Comput Biol*, 4(11), e1000217. doi:10.1371/journal.pcbi.1000217
- 7 Lee, J. M., & Bernstein, A. (1993). p53 mutations increase resistance to ionizing radiation. *Proc Natl Acad Sci U S A*,  
8 90(12), 5742-5746. doi:10.1073/pnas.90.12.5742
- 9 Levine, A. J. (1997). p53, the cellular gatekeeper for growth and division. *Cell*, 88(3), 323-331. doi:10.1016/s0092-  
10 8674(00)81871-1
- 11 Li, H., Handsaker, B., Wysoker, A., Fennell, T., Ruan, J., Homer, N., . . . Genome Project Data Processing, S. (2009). The  
12 Sequence Alignment/Map format and SAMtools. *Bioinformatics*, 25(16), 2078-2079.  
13 doi:10.1093/bioinformatics/btp352
- 14 Liu, Y., & Gu, W. (2022). p53 in ferroptosis regulation: the new weapon for the old guardian. *Cell Death Differ*.  
15 doi:10.1038/s41418-022-00943-y
- 16 Love, M. I., Huber, W., & Anders, S. (2014). Moderated estimation of fold change and dispersion for RNA-seq data with  
17 DESeq2. *Genome Biol*, 15(12), 550. doi:10.1186/s13059-014-0550-8
- 18 Lowe, S. W., Bodis, S., McClatchey, A., Remington, L., Ruley, H. E., Fisher, D. E., . . . Jacks, T. (1994). p53 status and the  
19 efficacy of cancer therapy in vivo. *Science*, 266(5186), 807-810. doi:10.1126/science.7973635
- 20 Maddalena, M., Mallel, G., Nataraj, N. B., Shreberk-Shaked, M., Hassin, O., Mukherjee, S., . . . Oren, M. (2021). TP53  
21 missense mutations in PDAC are associated with enhanced fibrosis and an immunosuppressive  
22 microenvironment. *Proc Natl Acad Sci U S A*, 118(23). doi:10.1073/pnas.2025631118
- 23 Mantovani, F., Collavin, L., & Del Sal, G. (2019). Mutant p53 as a guardian of the cancer cell. *Cell Death Differ*, 26(2),  
24 199-212. doi:10.1038/s41418-018-0246-9
- 25 Martins, C. P., Brown-Swigart, L., & Evan, G. I. (2006). Modeling the therapeutic efficacy of p53 restoration in tumors.  
26 *Cell*, 127(7), 1323-1334. doi:10.1016/j.cell.2006.12.007
- 27 Moll, U. M., LaQuaglia, M., Benard, J., & Riou, G. (1995). Wild-type p53 protein undergoes cytoplasmic sequestration in  
28 undifferentiated neuroblastomas but not in differentiated tumors. *Proc Natl Acad Sci U S A*, 92(10), 4407-4411.  
29 doi:10.1073/pnas.92.10.4407
- 30 Moll, U. M., Riou, G., & Levine, A. J. (1992). Two distinct mechanisms alter p53 in breast cancer: mutation and nuclear  
31 exclusion. *Proc Natl Acad Sci U S A*, 89(15), 7262-7266. doi:10.1073/pnas.89.15.7262
- 32 Momand, J., Zambetti, G. P., Olson, D. C., George, D., & Levine, A. J. (1992). The mdm-2 oncogene product forms a  
33 complex with the p53 protein and inhibits p53-mediated transactivation. *Cell*, 69(7), 1237-1245.  
34 doi:10.1016/0092-8674(92)90644-r
- 35 Oren, M., & Rotter, V. (2010). Mutant p53 gain-of-function in cancer. *Cold Spring Harb Perspect Biol*, 2(2), a001107.  
36 doi:10.1101/cshperspect.a001107
- 37 Parker, J. S., Mullins, M., Cheang, M. C., Leung, S., Voduc, D., Vickery, T., . . . Bernard, P. S. (2009). Supervised risk  
38 predictor of breast cancer based on intrinsic subtypes. *J Clin Oncol*, 27(8), 1160-1167.  
39 doi:10.1200/JCO.2008.18.1370
- 40 Pitroda, S. P., Pashtan, I. M., Logan, H. L., Budke, B., Darga, T. E., Weichselbaum, R. R., & Connell, P. P. (2014). DNA  
41 repair pathway gene expression score correlates with repair proficiency and tumor sensitivity to  
42 chemotherapy. *Sci Transl Med*, 6(229), 229ra242. doi:10.1126/scitranslmed.3008291
- 43 Ravi, R., Mookerjee, B., Bhujwalla, Z. M., Sutter, C. H., Artemov, D., Zeng, Q., . . . Bedi, A. (2000). Regulation of tumor  
44 angiogenesis by p53-induced degradation of hypoxia-inducible factor 1alpha. *Genes Dev*, 14(1), 34-44.
- 45 Ruan, H., Li, Q., Liu, Y., Liu, Y., Lussier, C., Diao, L., & Han, L. (2022). GPedit: the genetic and pharmacogenomic  
46 landscape of A-to-I RNA editing in cancers. *Nucleic Acids Res*, 50(D1), D1231-D1237. doi:10.1093/nar/gkab810
- 47 Sasaki, M., Nie, L., & Maki, C. G. (2007). MDM2 binding induces a conformational change in p53 that is opposed by  
48 heat-shock protein 90 and precedes p53 proteasomal degradation. *J Biol Chem*, 282(19), 14626-14634.  
49 doi:10.1074/jbc.M610514200
- 50 Schoenfelder, S., & Fraser, P. (2019). Long-range enhancer-promoter contacts in gene expression control. *Nat Rev*  
51 *Genet*, 20(8), 437-455. doi:10.1038/s41576-019-0128-0
- 52 Sengupta, S., & Harris, C. C. (2005). p53: traffic cop at the crossroads of DNA repair and recombination. *Nat Rev Mol Cell*  
53 *Biol*, 6(1), 44-55. doi:10.1038/nrm1546
- 54 Sermeus, A., & Michiels, C. (2011). Reciprocal influence of the p53 and the hypoxic pathways. *Cell Death Dis*, 2, e164.  
55 doi:10.1038/cddis.2011.48

- 1 Skinner, H. D., Sandulache, V. C., Ow, T. J., Meyn, R. E., Yordy, J. S., Beadle, B. M., . . . Myers, J. N. (2012). TP53  
2 disruptive mutations lead to head and neck cancer treatment failure through inhibition of radiation-induced  
3 senescence. *Clin Cancer Res*, *18*(1), 290-300. doi:10.1158/1078-0432.CCR-11-2260
- 4 Soussi, T., & Wiman, K. G. (2015). TP53: an oncogene in disguise. *Cell Death Differ*, *22*(8), 1239-1249.  
5 doi:10.1038/cdd.2015.53
- 6 Speers, C., Zhao, S., Liu, M., Bartelink, H., Pierce, L. J., & Feng, F. Y. (2015). Development and Validation of a Novel  
7 Radiosensitivity Signature in Human Breast Cancer. *Clin Cancer Res*, *21*(16), 3667-3677. doi:10.1158/1078-  
8 0432.CCR-14-2898
- 9 Stephens, P. J., McBride, D. J., Lin, M. L., Varela, I., Pleasance, E. D., Simpson, J. T., . . . Stratton, M. R. (2009). Complex  
10 landscapes of somatic rearrangement in human breast cancer genomes. *Nature*, *462*(7276), 1005-1010.  
11 doi:10.1038/nature08645
- 12 Surget, S., Khoury, M. P., & Bourdon, J. C. (2013). Uncovering the role of p53 splice variants in human malignancy: a  
13 clinical perspective. *Onco Targets Ther*, *7*, 57-68. doi:10.2147/OTT.S53876
- 14 Takamatsu, S., Brown, J. B., Yamaguchi, K., Hamanishi, J., Yamanoi, K., Takaya, H., . . . Matsumura, N. (2021). Utility of  
15 Homologous Recombination Deficiency Biomarkers Across Cancer Types. *JCO Precis Oncol*, *5*.  
16 doi:10.1200/PO.21.00141
- 17 Tchelebi, L., Ashamalla, H., & Graves, P. R. (2014). Mutant p53 and the response to chemotherapy and radiation. *Subcell*  
18 *Biochem*, *85*, 133-159. doi:10.1007/978-94-017-9211-0\_8
- 19 Teufel, D. P., Bycroft, M., & Fersht, A. R. (2009). Regulation by phosphorylation of the relative affinities of the N-  
20 terminal transactivation domains of p53 for p300 domains and Mdm2. *Oncogene*, *28*(20), 2112-2118.  
21 doi:10.1038/onc.2009.71
- 22 Tian, S., Lai, J., Yu, T., Li, Q., & Chen, Q. (2020). Regulation of Gene Expression Associated With the N6-Methyladenosine  
23 (m6A) Enzyme System and Its Significance in Cancer. *Front Oncol*, *10*, 623634. doi:10.3389/fonc.2020.623634
- 24 Tomfohr, J., Lu, J., & Kepler, T. B. (2005). Pathway level analysis of gene expression using singular value decomposition.  
25 *BMC Bioinformatics*, *6*, 225. doi:10.1186/1471-2105-6-225
- 26 Tominaga, O., Hamelin, R., Trouvat, V., Salmon, R. J., Lesec, G., Thomas, G., & Remvikos, Y. (1993). Frequently elevated  
27 content of immunochemically defined wild-type p53 protein in colorectal adenomas. *Oncogene*, *8*(10), 2653-  
28 2658.
- 29 Vaubel, R. A., Tian, S., Remonde, D., Schroeder, M. A., Mladek, A. C., Kitange, G. J., . . . Sarkaria, J. N. (2020). Genomic  
30 and Phenotypic Characterization of a Broad Panel of Patient-Derived Xenografts Reflects the Diversity of  
31 Glioblastoma. *Clin Cancer Res*, *26*(5), 1094-1104. doi:10.1158/1078-0432.CCR-19-0909
- 32 Ventura, A., Kirsch, D. G., McLaughlin, M. E., Tuveson, D. A., Grimm, J., Lintault, L., . . . Jacks, T. (2007). Restoration of  
33 p53 function leads to tumour regression in vivo. *Nature*, *445*(7128), 661-665. doi:10.1038/nature05541
- 34 Vogelstein, B., Papadopoulos, N., Velculescu, V. E., Zhou, S., Diaz, L. A., Jr., & Kinzler, K. W. (2013). Cancer genome  
35 landscapes. *Science*, *339*(6127), 1546-1558. doi:10.1126/science.1235122
- 36 Vousden, K. H., & Lane, D. P. (2007). p53 in health and disease. *Nat Rev Mol Cell Biol*, *8*(4), 275-283.  
37 doi:10.1038/nrm2147
- 38 Wasylishen, A. R., & Lozano, G. (2016). Attenuating the p53 Pathway in Human Cancers: Many Means to the Same End.  
39 *Cold Spring Harb Perspect Med*, *6*(8). doi:10.1101/cshperspect.a026211
- 40 Yamakuchi, M., Lotterman, C. D., Bao, C., Hruban, R. H., Karim, B., Mendell, J. T., . . . Lowenstein, C. J. (2010). P53-  
41 induced microRNA-107 inhibits HIF-1 and tumor angiogenesis. *Proc Natl Acad Sci U S A*, *107*(14), 6334-6339.  
42 doi:10.1073/pnas.0911082107
- 43 Zhang, Y., & Reinberg, D. (2001). Transcription regulation by histone methylation: interplay between different covalent  
44 modifications of the core histone tails. *Genes Dev*, *15*(18), 2343-2360. doi:10.1101/gad.927301

45  
46  
47  
48  
49  
50  
51  
52

1

## Figures

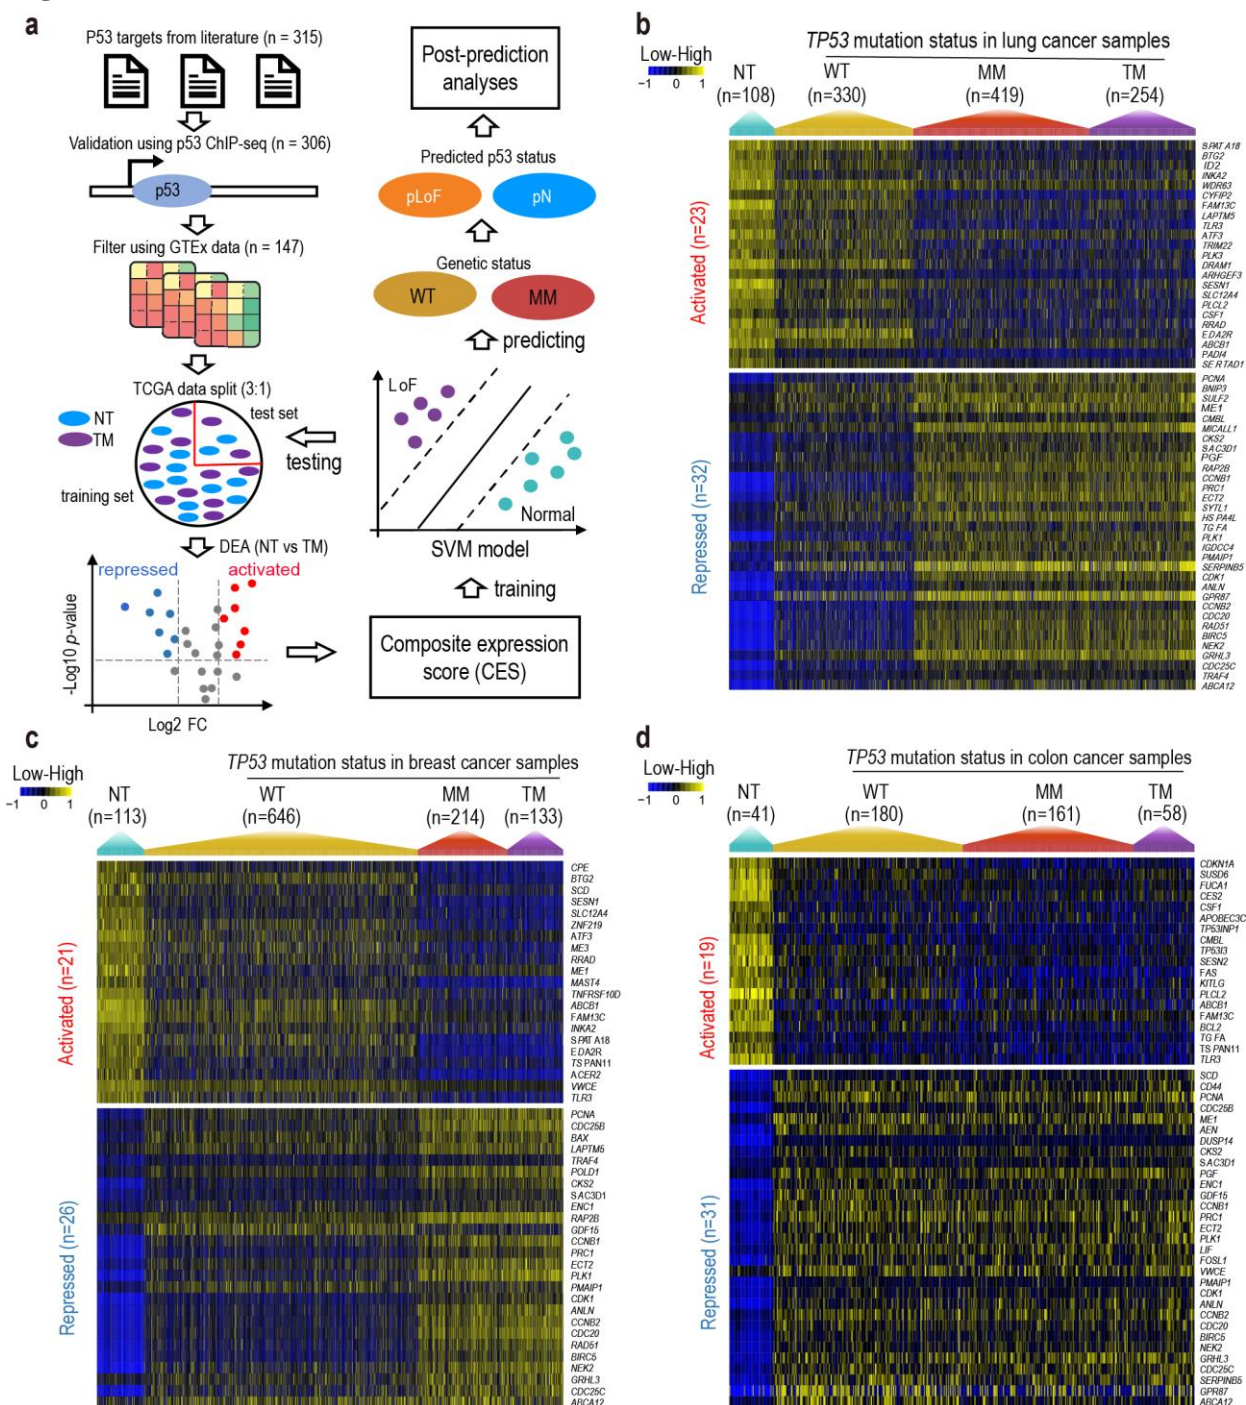

**Figure 1. Identification of p53 target genes and their expression profiles in TCGA lung, breast, and colon cancers.** (a) The analytic workflow to identify p53 target genes, train and validate SVM models. (b-d) Heatmaps show the expression profiles of p53-activated and repressed genes in TCGA lung, breast, and colon cancers. Samples in each cohort were divided into four groups according to TCGA designation, including NT (adjacent normal tissue), WT (tumor tissue with wild-type *TP53*), MM (tumor tissue with *TP53* missense mutation or in-frame mutation), and TM (tumor tissue with *TP53* truncating mutation). CES, composite expression score; DEA, differential expression analysis; FC, fold change; GTEx, Genotype-Tissue Expression; pLoF, predicted loss of function; pN, predicted normal; SVM, support vector machine.



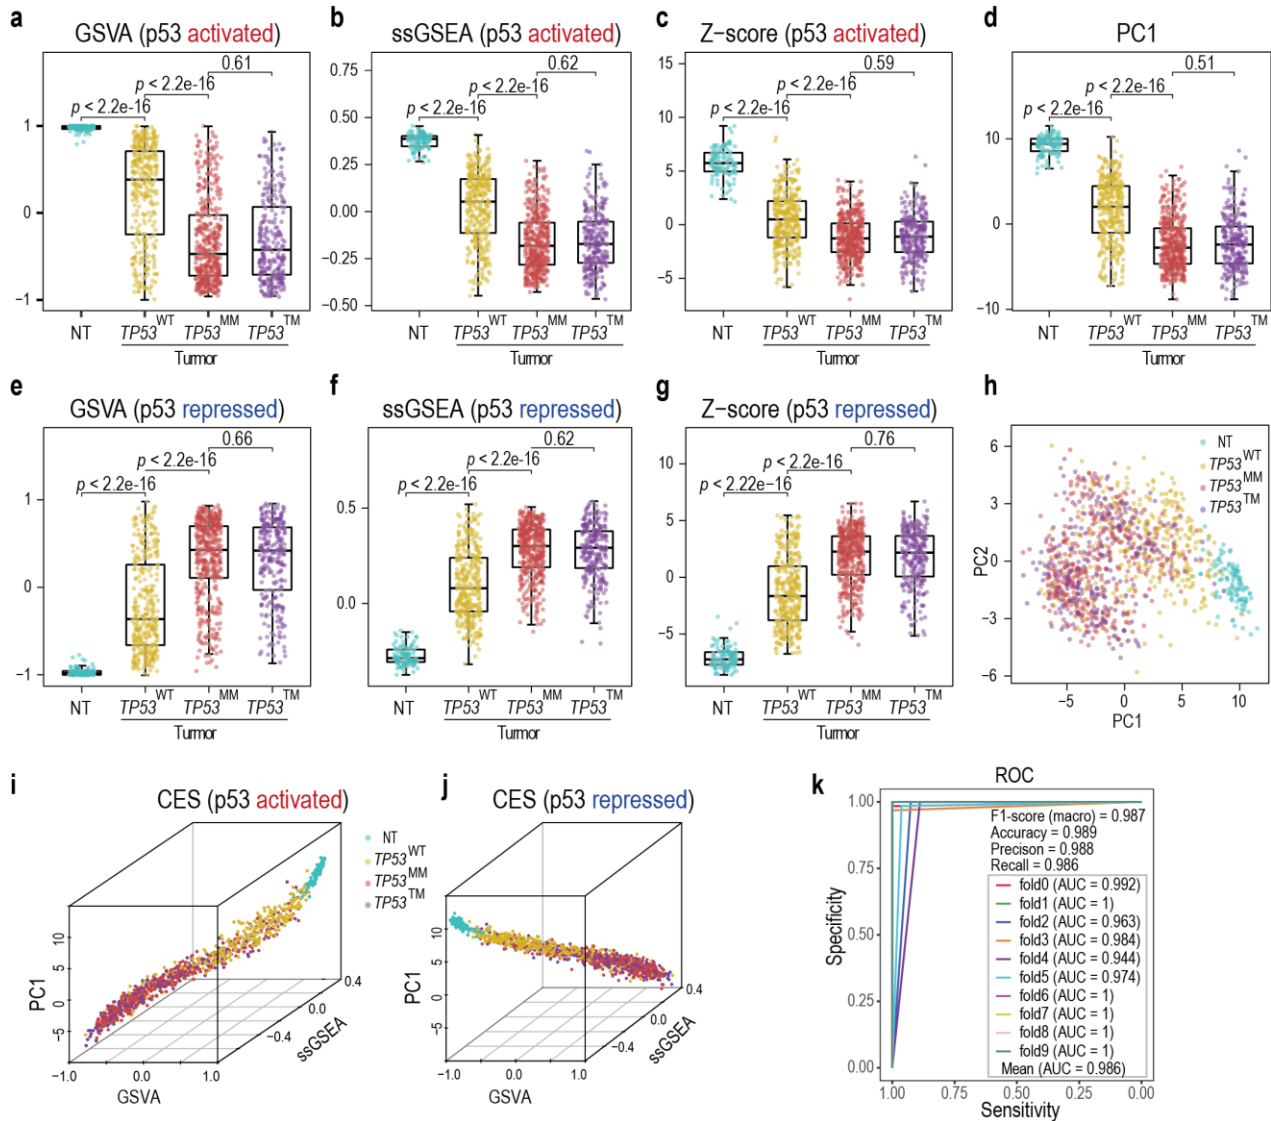

**Figure 2. Composite expression scores (CES) and the ROC curve of the SVM model built from the TCGA lung cancer cohort.** (a-c) CES scores of p53-activated genes calculated by GSVa, ssGSEA, and Z-score. In each panel, the blue, yellow, red, and purple box-and-whisker plots indicate the distribution of CES scores in NT, WT, MM, and TM groups, respectively. (d) CES score calculated by the first principal component scores (PC1). The p53-activated and p53-repressed genes were combined. (e-g) CES scores of p53-repressed genes calculated by GSVa, ssGSEA, and Z-score. (h) A two-dimensional PCA plot shows the clusters of NT, WT, MM, and TM groups. (i-j) Three-dimensional scatter plots show the combinatorial effects of CES score calculated from p53-activated genes and repressed genes, respectively. (k) The performance of the SVM model was evaluated using ten-fold cross-validation. GSVa, gene set variation analysis; ssGSEA, single-sample gene set enrichment analysis; PCA, principal component analysis; AUC, area under the curve; ROC, receiver operating characteristic; NT, normal tissue;  $TP53^{WT}$ , samples with wild-type  $TP53$ ;  $TP53^{MM}$ , samples with  $TP53$  missense mutation or in-frame mutation;  $TP53^{TM}$ , samples with  $TP53$  truncating mutation.

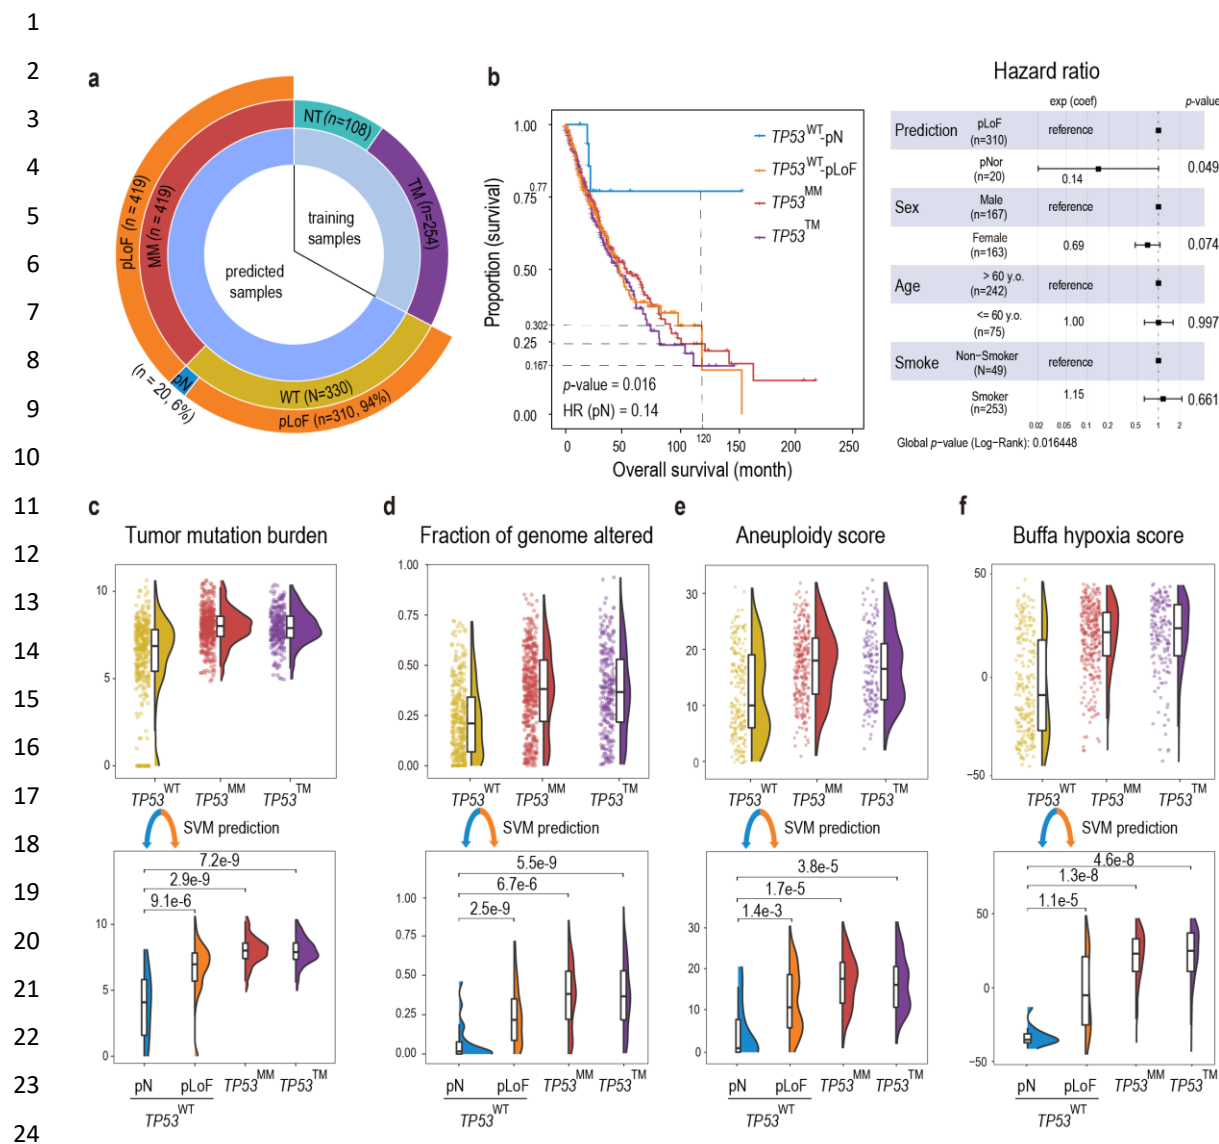

**Figure 3. Evaluation of the SVM predictions in the TCGA lung cancer cohort.** (a) A sunburst chart shows the breakdown of the lung cancer samples before (inner and middle layer circles) and after (outer layer circle) prediction. Samples used to train the SVM model include NT (adjacent normal tissue) and  $TP53^{TM}$  (tumor tissue with  $TP53$  truncating mutation) groups, representing p53-normal and p53-LoF status, respectively. Samples that were subjected to SVM prediction include  $TP53^{WT}$  (tumor tissue with wild-type  $TP53$ ) and  $TP53^{MM}$  (tumor tissue with  $TP53$  missense mutation or in-frame mutation) groups. Samples in  $TP53^{WT}$  and  $TP53^{MM}$  groups were predicted to be normal (pN) or LoF (pLoF) by the SVM model. (b) Left: overall survival of patients with  $TP53^{MM}$ ,  $TP53^{TM}$ ,  $TP53^{WT}$ -pN (wild type  $TP53$  which were predicted to be normal) and  $TP53^{WT}$ -pLoF (wild-type  $TP53$  which were predicted to be loss of function) tumors. Right: forest plot of a Cox Proportional-Hazards model showing  $p$ -values, hazard ratios, and the 95% confidence intervals for covariates. (c) Upper panel: Comparison of tumor mutational burden (TMB) among  $TP53^{WT}$ ,  $TP53^{MM}$ , and  $TP53^{TM}$  groups. Lower panel: the  $TP53^{WT}$  tumors were further divided into two subgroups ( $TP53^{WT}$ -pN and  $TP53^{WT}$ -pLoF) according to the SVM prediction. (d) Similar to (c), comparison of the copy number variation burden measured by “Fraction of genome altered”. (e) Similar to (c), comparison of the aneuploidy score. (f) Similar to (c), comparison of hypoxia score.

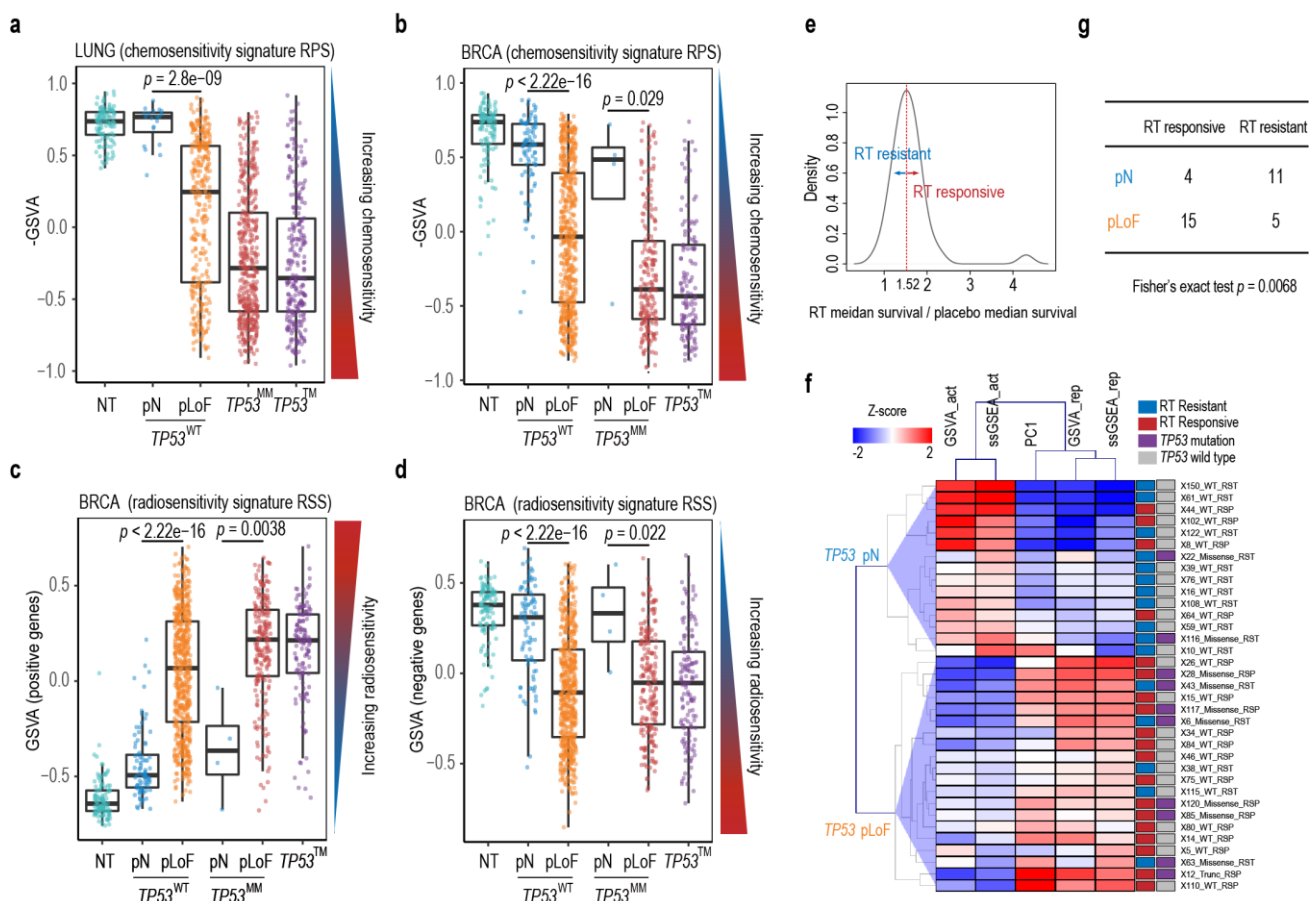

**Figure 4. Relationships between p53 status and chemo- and radiation therapy sensitivities.** (a-b) Comparison of the RPS scores (represented by -GSVA here, see Methods) amongst the NT,  $TP53^{WT}$ -pN,  $TP53^{WT}$ -pLoF,  $TP53^{MM}$ , and  $TP53^{TM}$  groups in the TCGA LUNG and BRCA cohorts, respectively. (c-d) Comparison of the RSS scores of positive and negative genes amongst NT,  $TP53^{WT}$ -pN,  $TP53^{WT}$ -pLoF,  $TP53^{MM}$ -pN,  $TP53^{MM}$ -pLoF, and  $TP53^{TM}$  groups in the BRCA cohort, respectively. RSS was calculated from genes positively associated with radiosensitivity using the GSVA algorithm. (e) Distribution of ratio of median survival days between the RT group and the placebo group. PDX models with ratios  $\geq 1.52$  were considered as RT-responsive. (f) A heatmap shows the p53 function status predicted by unsupervised clustering using composite expression (GSVA, ssGSEA, and PC1) of GBM specific p53 target genes in PDX data. RT response and  $TP53$  mutation status of each sample are color coded on the right side. (g) A contingency table shows that pLoF samples are associated with RT responsive.

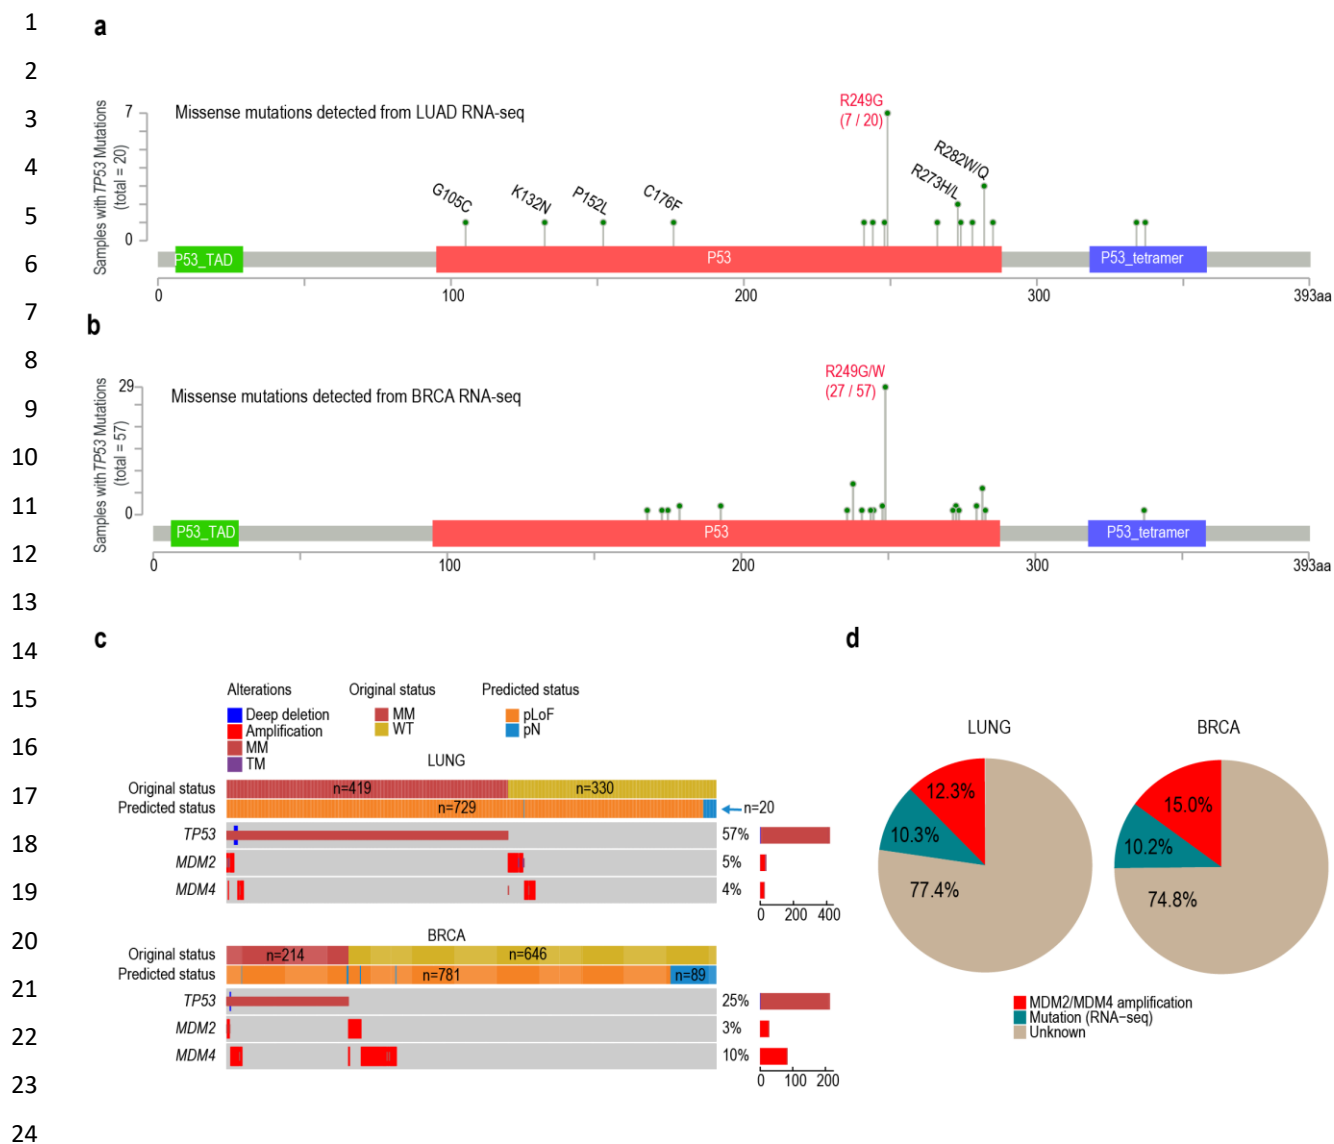

25 **Figure 5. Dissection of  $TP53^{WT}$ -pLoF cases.** (a-b) Lollipop charts show the position of missense mutations  
26 identified using RNA-seq data but missed from the whole-exome sequencing data in TCGA lung adenocarcinoma  
27 (LUAD) and breast invasive carcinomas (BRCA), respectively. (c) Oncoprint plot shows the  $TP53$ 's original and  
28 predicted status, comparing with the  $MDM2$  and  $MDM4$  amplification status. Percentages of samples with  
29  $TP53/MDM2/MDM4$  variations among the prediction set (MM and WT samples) are listed on the right side, as  
30 well as the numbers of these samples (indicated by bar plots). (d) Pie charts show the fraction of  $TP53^{WT}$ -pLoF cases that  
31 can be explained by “mutation detected from RNA-seq” (green) and “ $MDM2$  or  $MDM4$ ” amplification (red).

32  
33  
34  
35  
36  
37  
38  
39  
40

## 1 **Supplementary figures**

### 2 **Supplementary Fig. 1**

3 Validation of p53 target genes in  $\gamma$  irradiated MCF-7 cells harboring wild type *TP53*.

### 4 **Supplementary Fig. 2**

5 Core p53 targets among the four cancer cohorts (LUNG, BRCA, COAD and ESCA).

### 6 **Supplementary Fig. 3**

7 Correlations between different CES scores.

### 8 **Supplementary Fig. 4**

9 Comparison of CES score distributions among different *TP53* groups.

### 10 **Supplementary Fig. 5**

11 Pan-cancer analysis.

### 12 **Supplementary Fig. 6**

13 Distribution of predicted p53 status for *TP53*<sup>WT</sup> (WT group) and *TP53*<sup>MM</sup> (MM group) tumor samples across the  
14 five cohorts.

### 15 **Supplementary Fig. 7**

16 Comparing progression-free survival (PFS) of *TP53*<sup>MM</sup>, *TP53*<sup>TM</sup>, *TP53*<sup>WT</sup>-pN and *TP53*<sup>WT</sup>-pLoF patients of  
17 TCGA BRCA cohort.

### 18 **Supplementary Fig. 8**

19 Relationships between p53 status and chemo-and radiation therapy sensitivities after removing the overlapped  
20 genes.

### 21 **Supplementary Fig. 9**

22 Comparison of p53 expression levels between *TP53*<sup>WT</sup>-pN and *TP53*<sup>WT</sup>-pLoF samples in LUNG cohort.

### 23 **Supplementary Fig. 10**

24 Examples of *TP53* somatic mutations identified from RNA-seq data but missed by TCGA WES calls.

### 25 **Supplementary Fig. 11**

26 p53 mutants identified from RNA-seq data (indicated as the RM group) exhibit similar genomic characteristics  
27 as the *TP53*<sup>MM</sup> and *TP53*<sup>TM</sup> groups.

### 28 **Supplementary Fig. 12**

29 Genomics alteration status of *TP53* and the other well-known tumor suppressor genes across different TCGA  
30 cancer types.

31

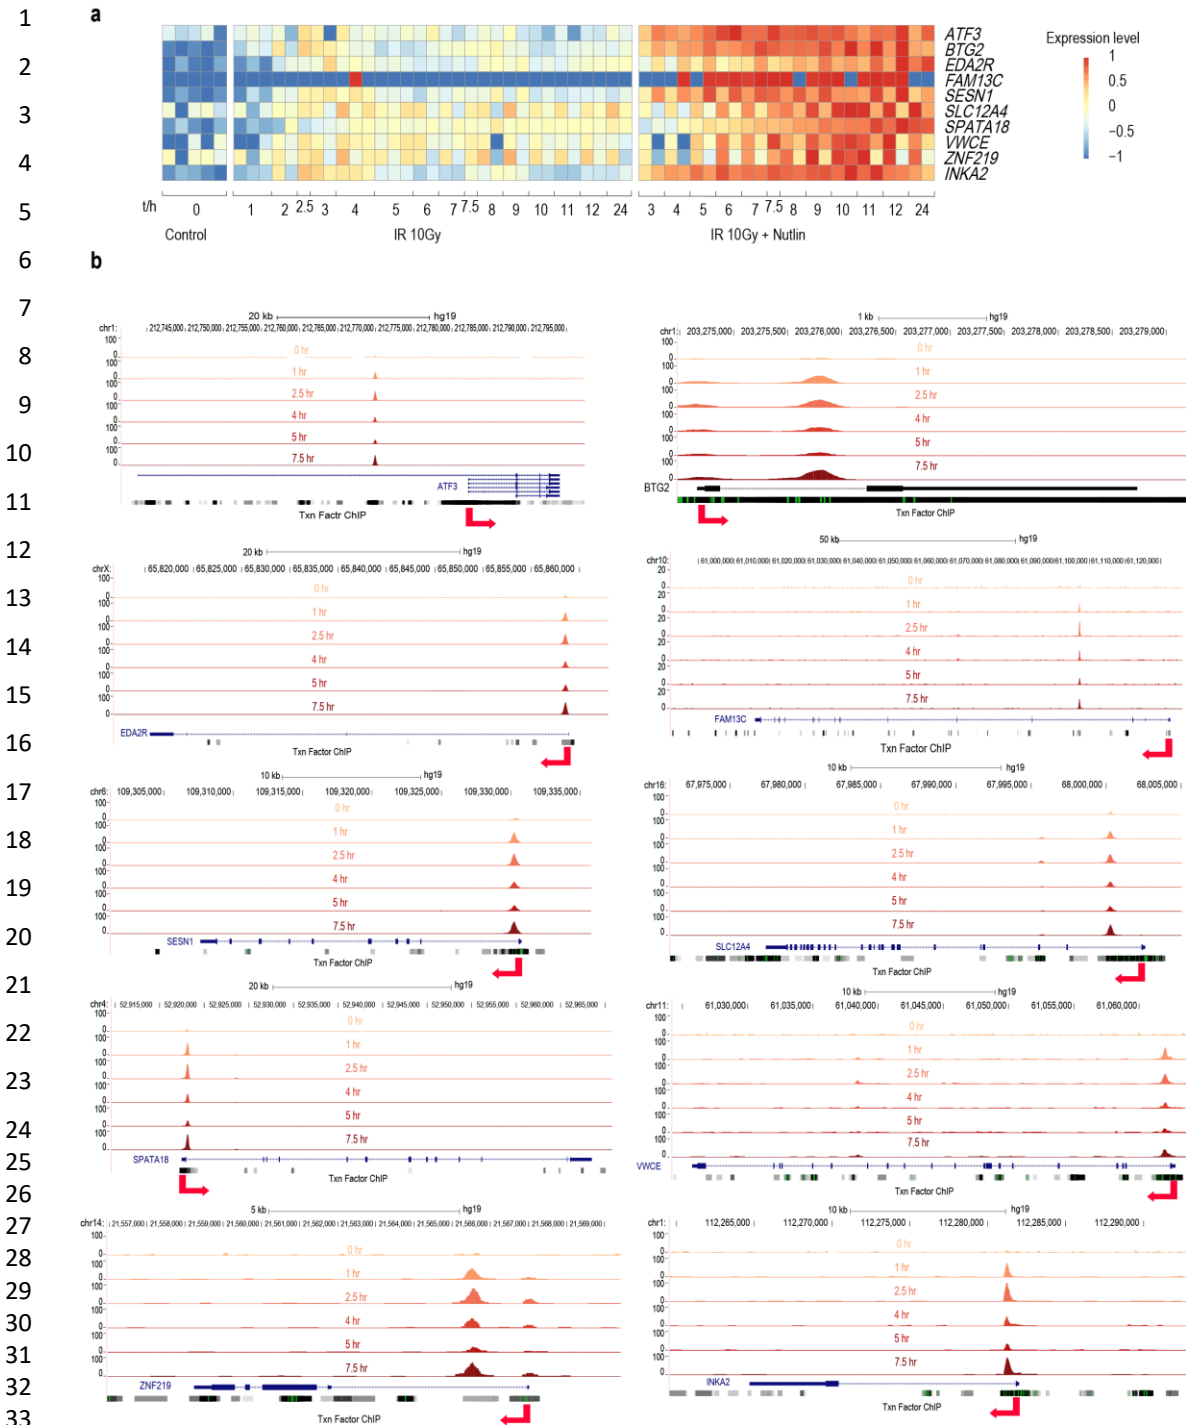

**Supplementary Fig. 1.** Validation of p3 target genes in  $\gamma$  irradiated MCF-7 cells harboring wild-type *TP53*. (a) Changes of expression levels of p3 targets after  $\gamma$  irradiation, and  $\gamma$  irradiation with nutlin treatment. (b) Visualization of p3 binding sites (p3 ChIP-seq signals) around the promoter regions of genes in (a).

1  
2  
3  
4  
5  
6  
7  
8  
9  
10  
11  
12  
13  
14  
15  
16  
17  
18  
19  
20  
21  
22  
23  
24  
25  
26  
27  
28  
29  
30  
31  
32  
33  
34  
35  
36  
37  
38  
39  
40  
41

a

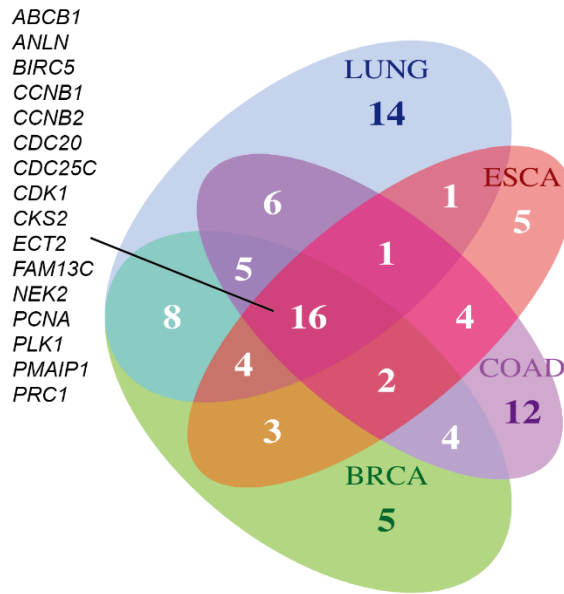

b

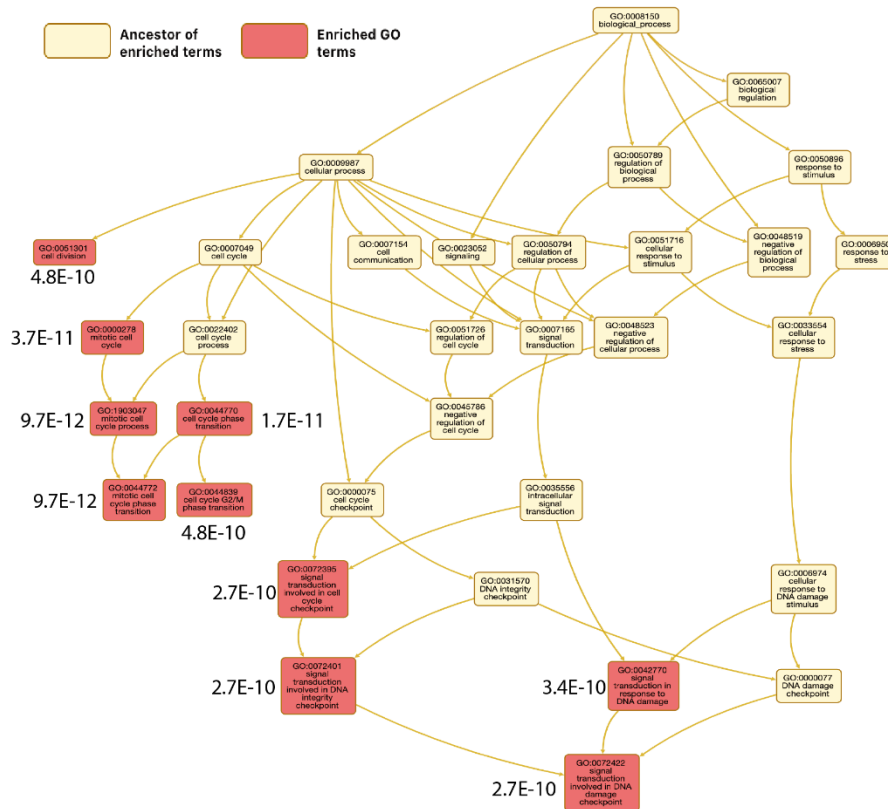

**Supplementary Fig. 2.** Core p53 targets among the four cancer cohorts (LUNG, BRCA, COAD and ESCA). (a) Venn diagram shows the overlaps of p53 targets among the four cancer types. (b) Gene Ontology (GO) enrichment results of the core p53 targets.

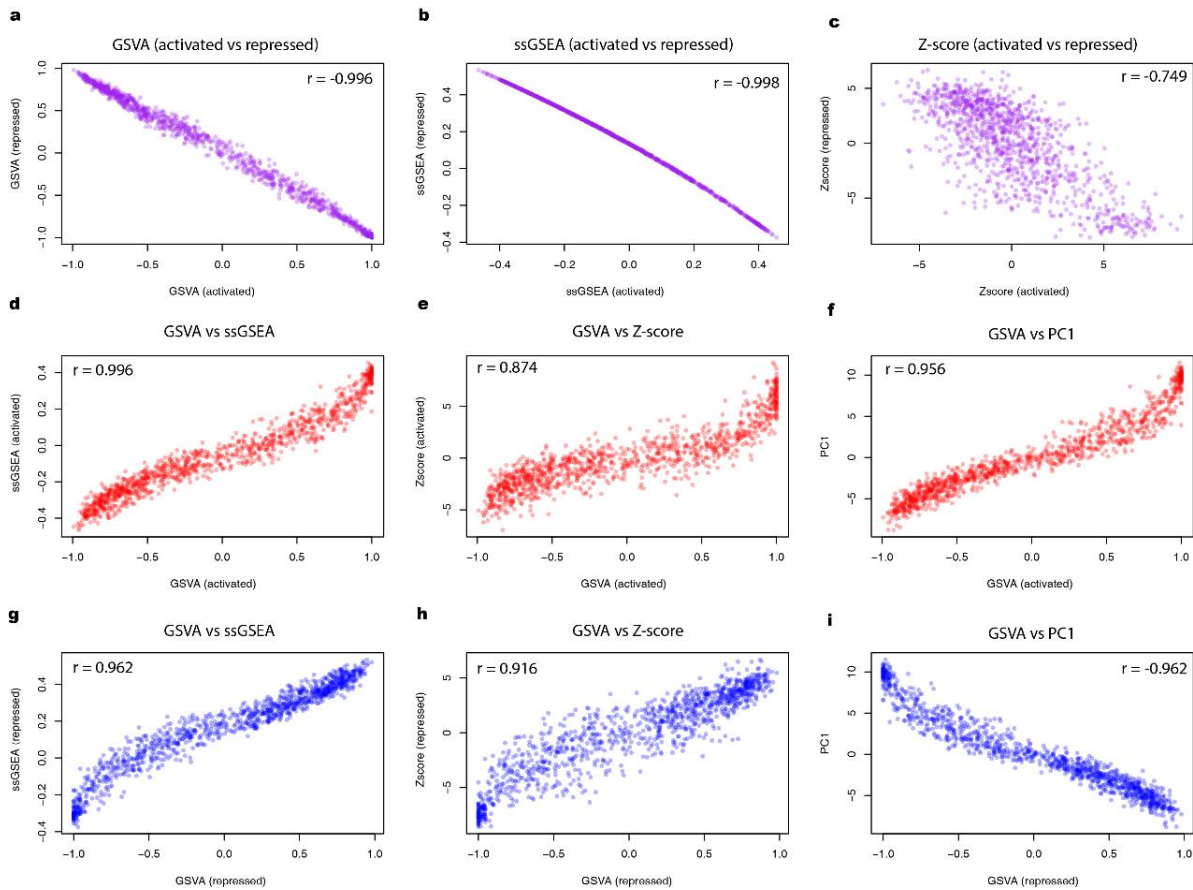

**Supplementary Fig. 3.** Correlations between different CES scores. (a-c) Significant inverse correlations between CES scores calculated from p53-activated and p53-repressed genes for GSVAs, ssGSEAs, and Z-score. Significant positive correlations between different CES scores for p53-activated genes (d-f) and between that for p53-repressed genes (g-h). (i) Significant inverse correlation between PC1 and the GSVAs of p53-repressed genes.



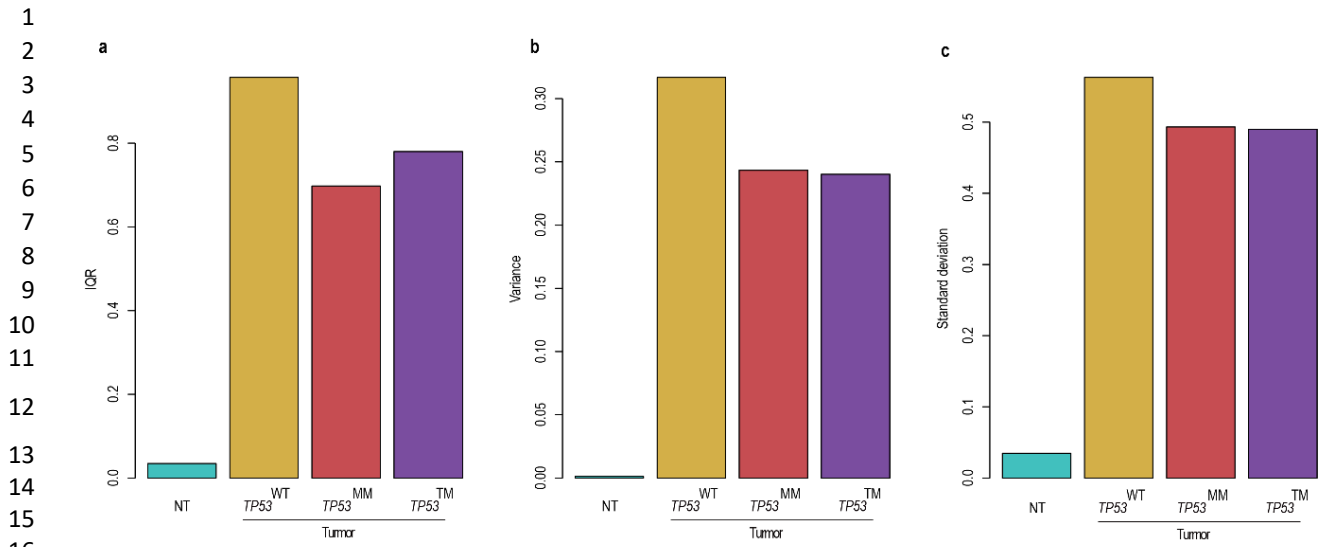

**Supplementary Fig. 4.** Comparison of CES score distributions among different *TP53* groups. Bar plots show the Interquartile Range (a), Variance (b), and Standard Deviation (c) of CES scores in NT, WT, MM, and TM groups.

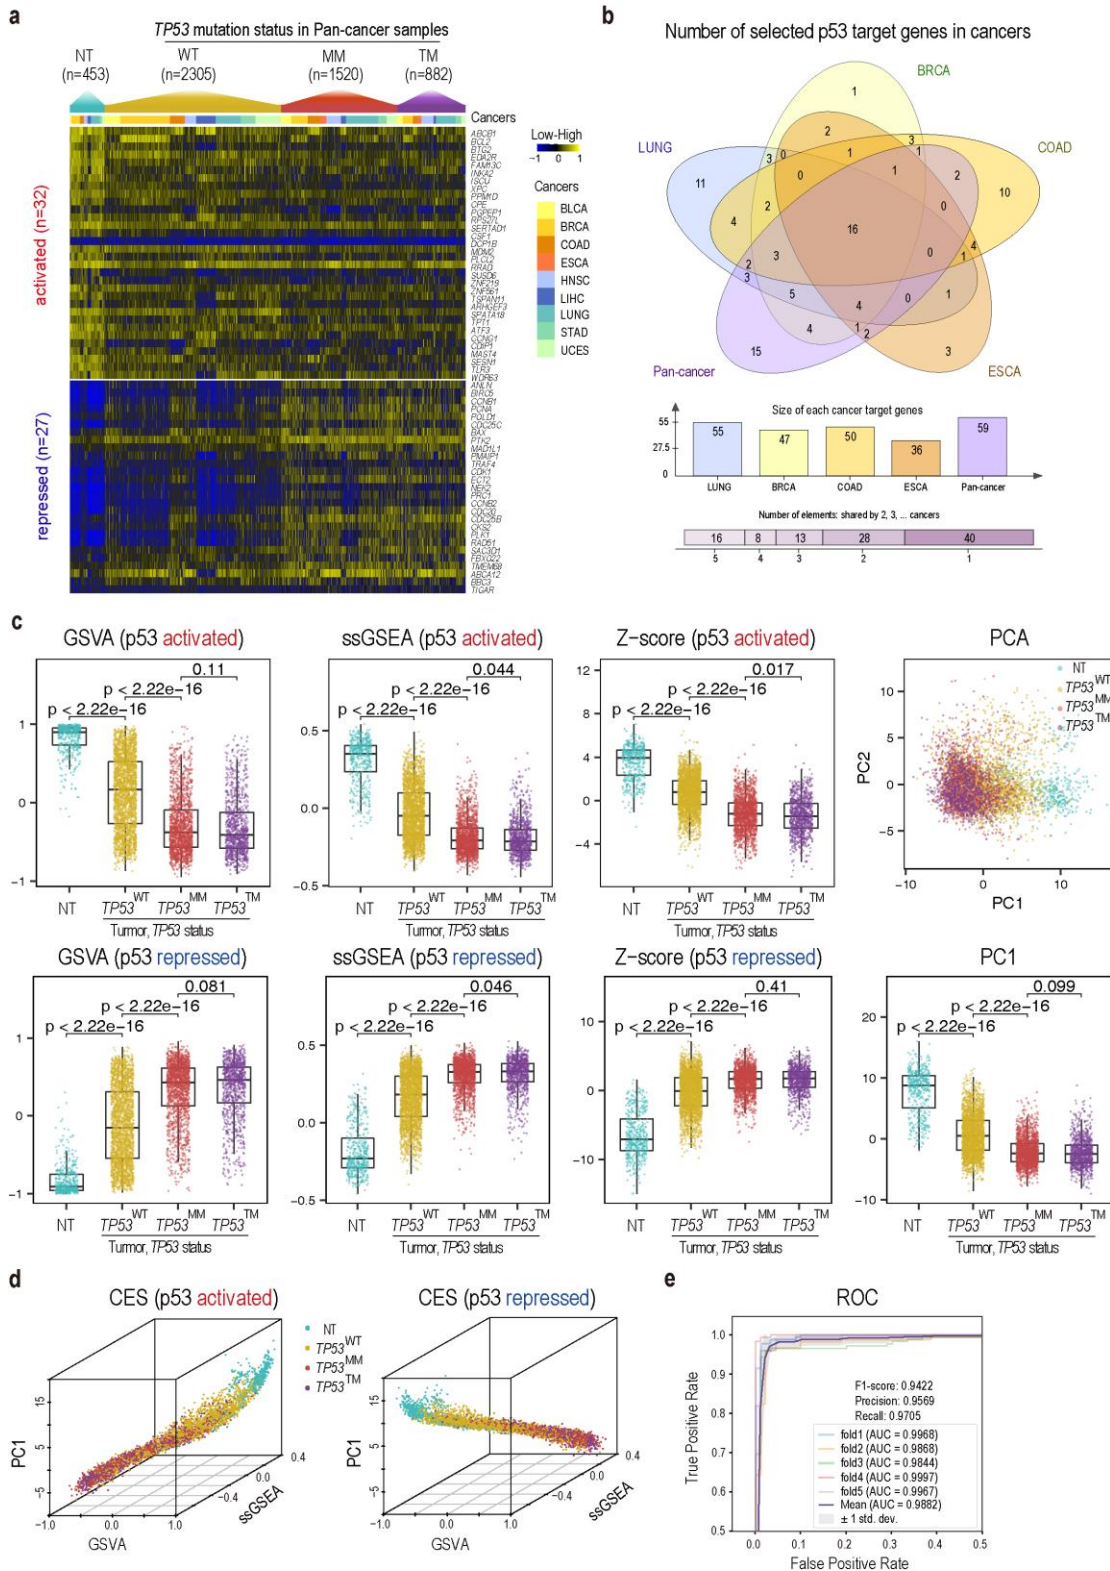

**Supplementary Fig. 5.** Pan-cancer analysis. (a) Heatmap shows the expression profiles of p53-activated genes and repressed genes across 9 cancer types. (b) Overlaps of p53 targets among pan-cancer cohort and four previously selected cancer cohorts. (c-d) CES scores calculated from p53 targets by different algorithms in pan-cancer cohort (similar to Figure 2). (e) ROC curve of the SVM model built from the pan-cancer cohort.

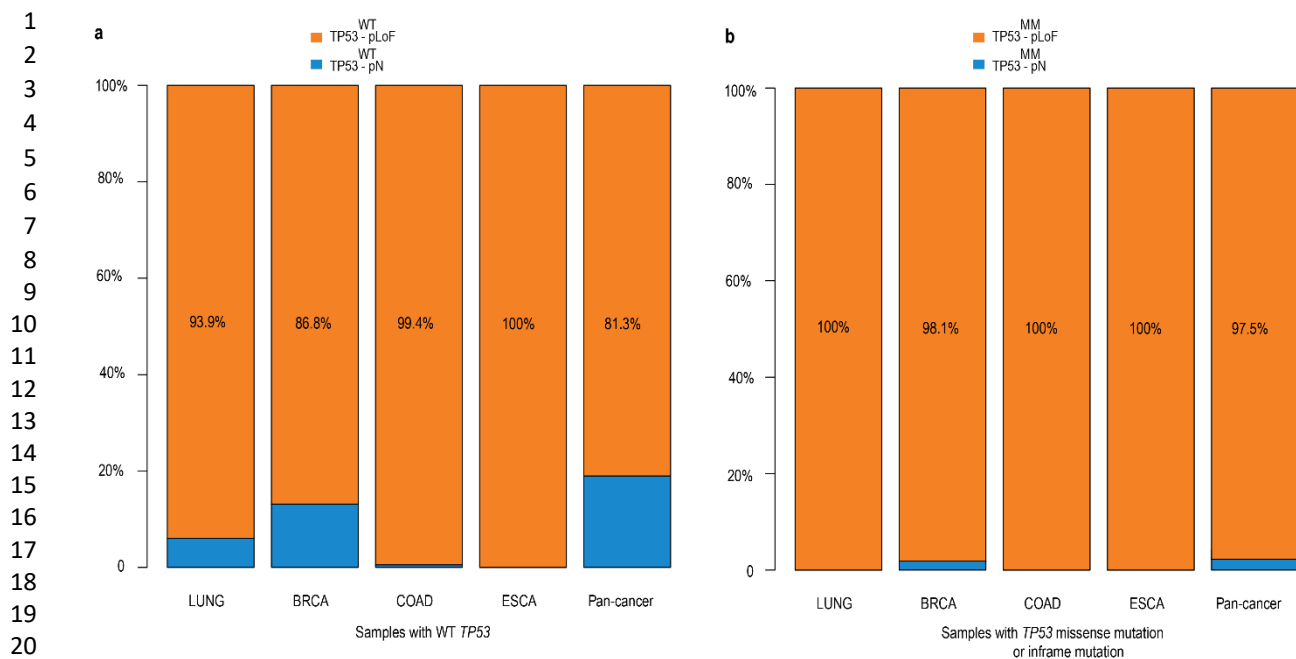

22 **Supplementary Fig. 6.** Distribution of predicted p53 status for  $TP53^{WT}$  (WT group) and  $TP53^{MM}$  (MM group)  
23 tumor samples across the five cohorts. Most tumor samples in WT (a) and MM (b) groups are predicted as LoF.  
24

25  
26  
27  
28  
29  
30  
31  
32  
33  
34  
35  
36  
37  
38  
39  
40  
41  
42  
43  
44  
45  
46  
47  
48  
49

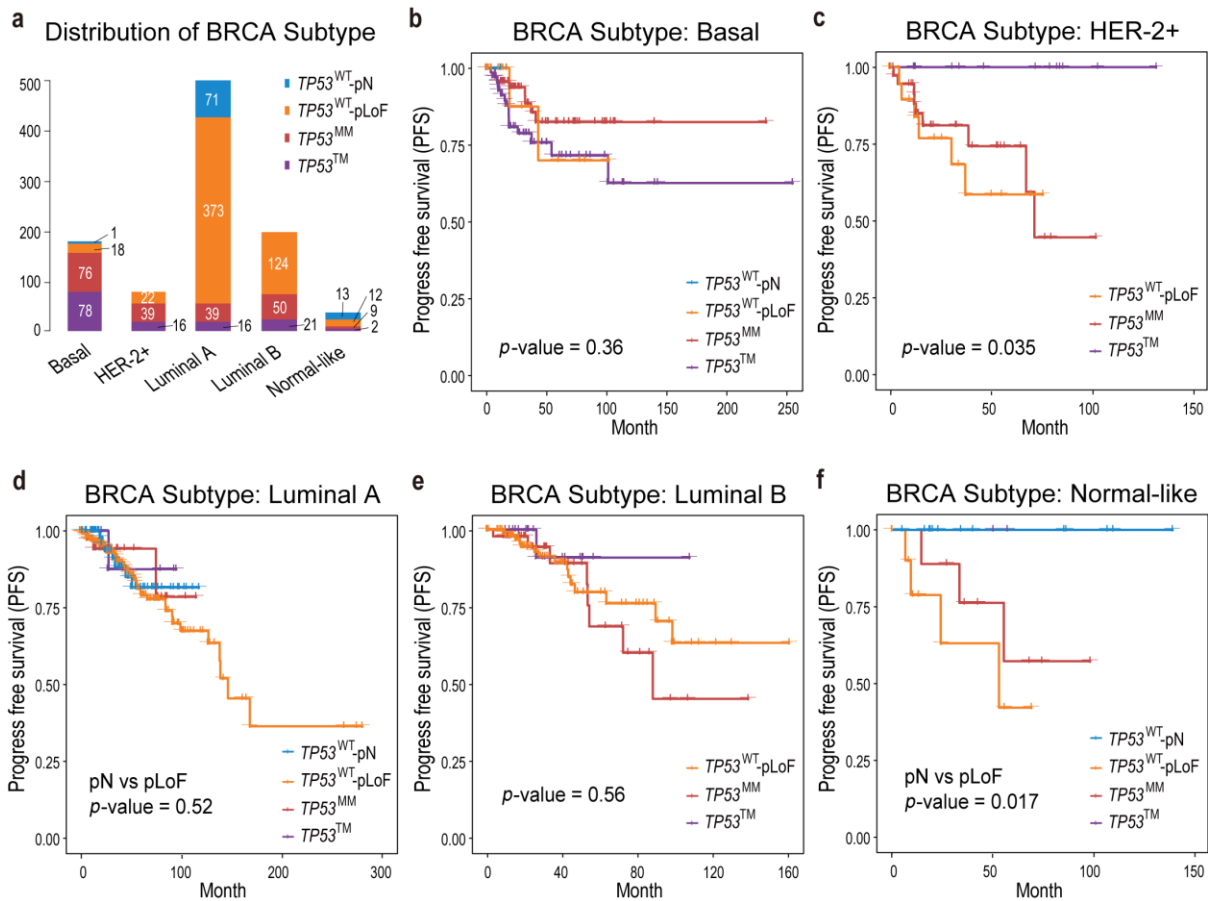

**Supplementary Fig. 7.** Comparing progression-free survival (PFS) of  $TP53^{MM}$ ,  $TP53^{TM}$ ,  $TP53^{WT-pN}$  and  $TP53^{WT-pLoF}$  patients of TCGA BRCA cohort. (a) Bar plot shows the breakdown of BRCA patients into five subtypes, including “Basal/triple negative”, “HER2+”, “Luminal A”, “Luminal B” and “Normal-like”. Each subtype is further divided into four subgroups based on  $TP53$  status. (b-f) Comparison of PFS for Basal, HER2+, Luminal A, Luminal B, and Normal-like subtype, respectively.

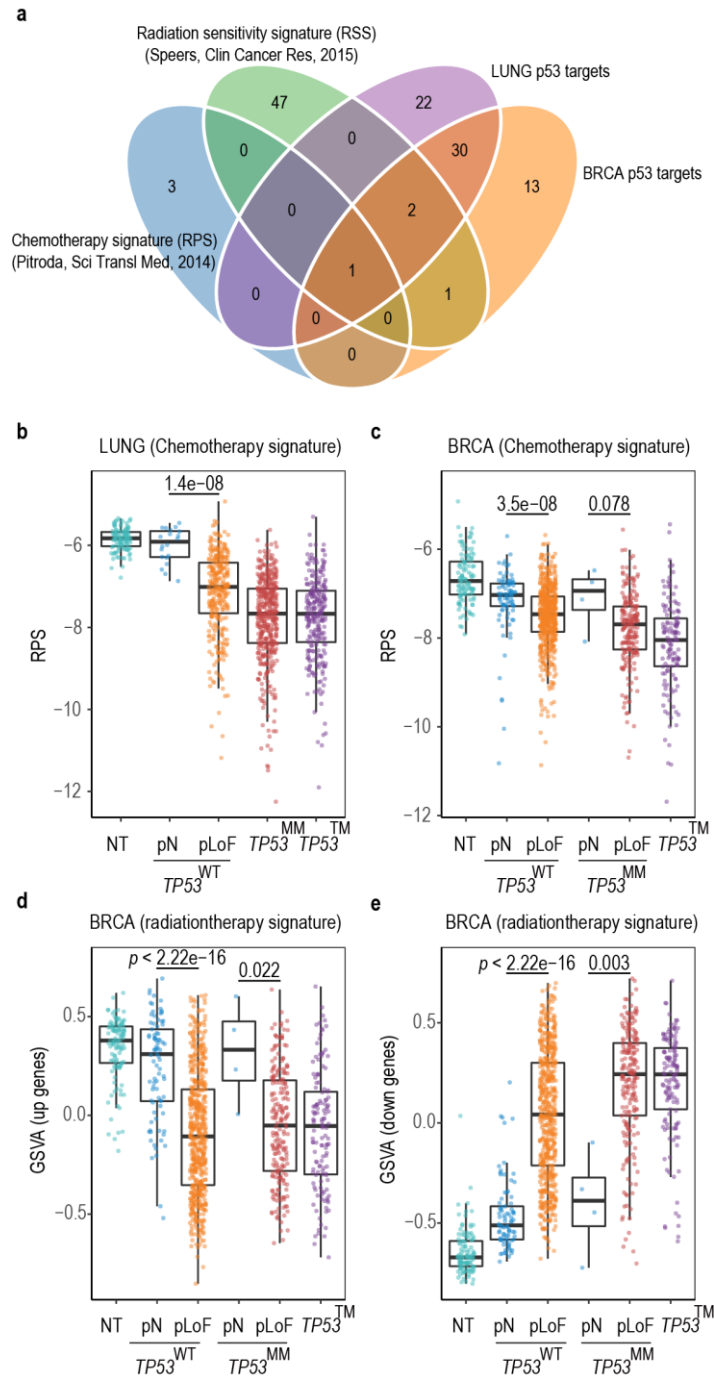

**Supplementary Fig. 8.** Relationships between p53 status and chemo- and radiation therapy sensitivities after removing the overlapped genes. (a) Venn diagram shows the overlap between p53 targets used in the LUNG SVM model, p53 targets used in the BRCA SVM model, the chemotherapy gene signature (recombination proficiency score, RPS), and the radiation sensitivity signature (RSS). (b-c) Comparison of the RPS scores (represented by -GSA here, see Methods) amongst NT,  $TP53^{WT}$ -pN,  $TP53^{WT}$ -pLoF,  $TP53^{MM}$ , and  $TP53^{TM}$  in the TCGA LUNG and BRCA cohort, respectively (similar to Figure 4 a-b). (d-e) Comparison of the RSS scores amongst NT,  $TP53^{WT}$ -pN,  $TP53^{WT}$ -pLoF,  $TP53^{MM}$ -pN,  $TP53^{MM}$ -pLoF and  $TP53^{TM}$  in the TCGA BRCA cohort (similar to Figure 4 c-d). GSA was used to calculate the PRS and RSS scores. Genes overlapped with p53 targets of either LUNG or BRCA were removed when calculating the RPS and RSS scores.

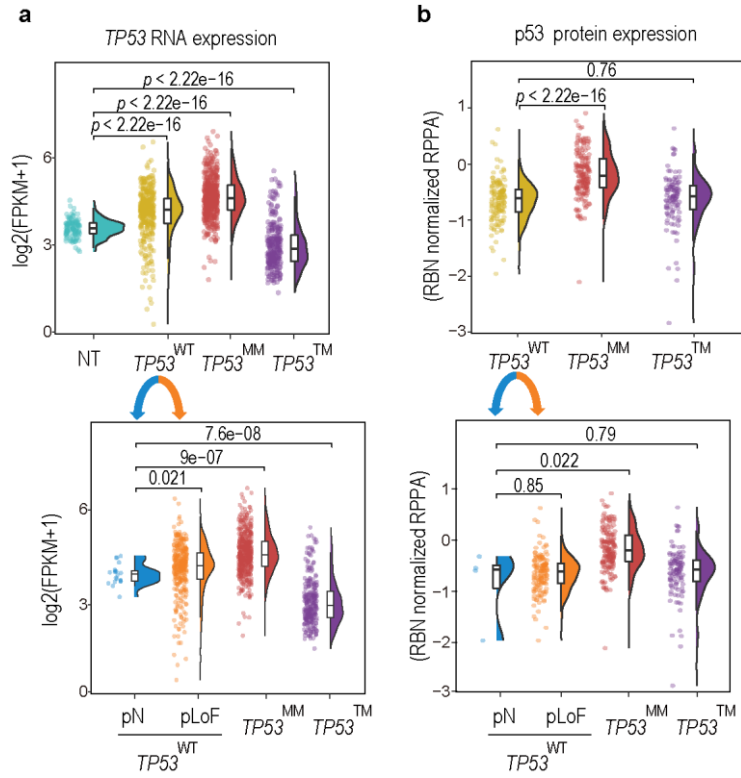

**Supplementary Fig. 9.** Comparison of p53 expression levels between  $TP53^{WT}$ -pLoF and  $TP53^{WT}$ -pN samples in LUNG cohort. (a) Comparison of the  $TP53$  RNA expression. (b) Comparison of the p53 abundance.

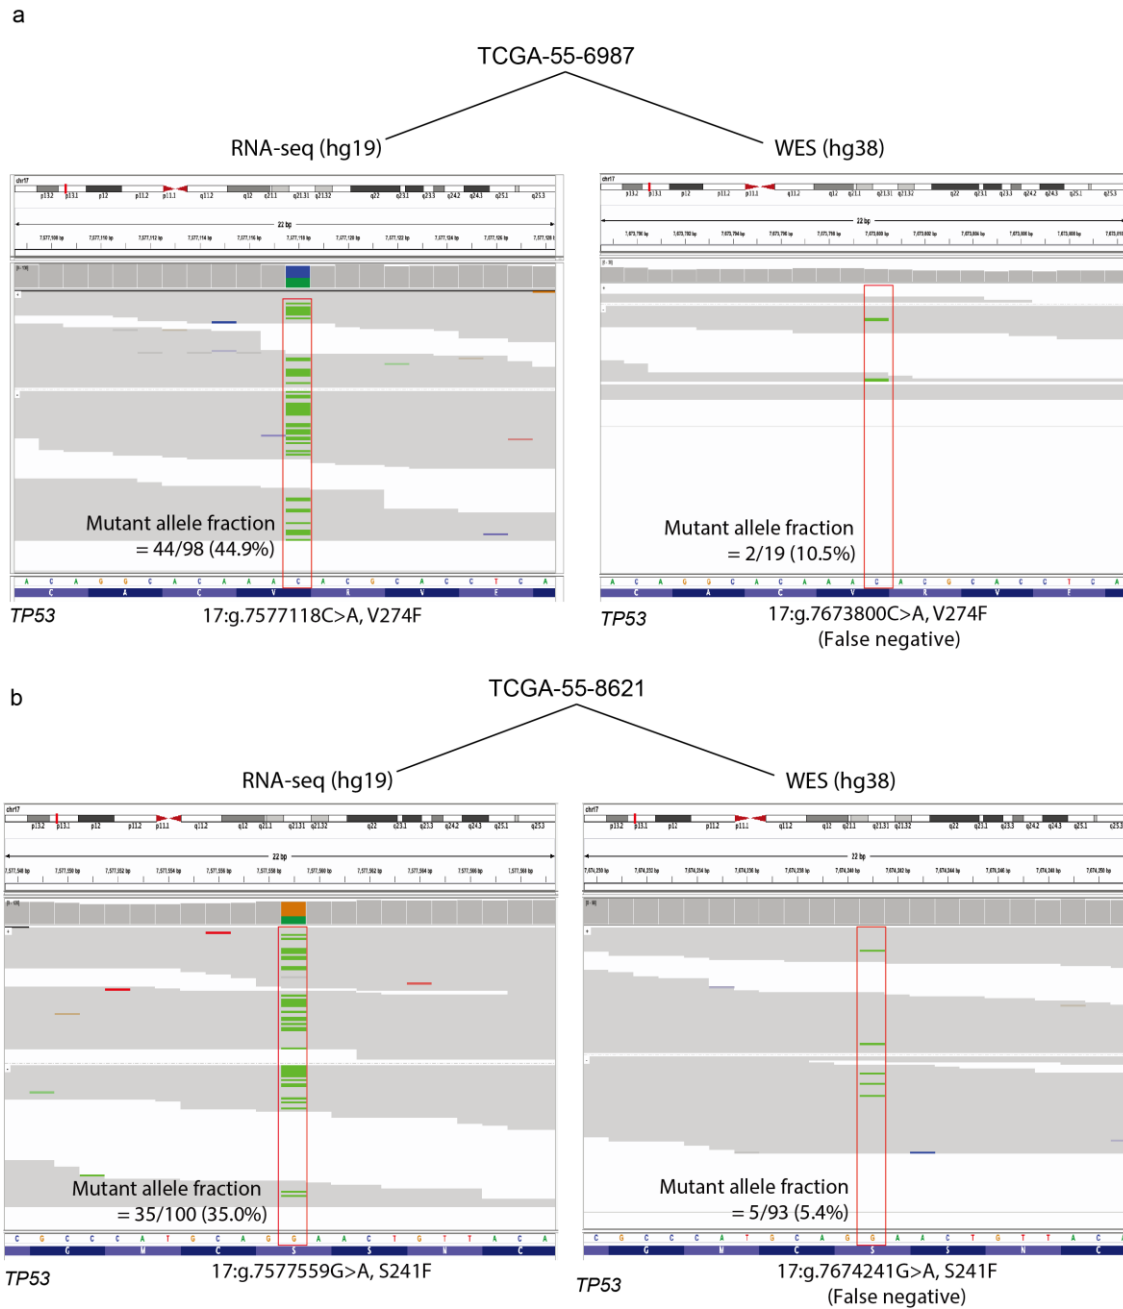

**Supplementary Fig. 10.** Examples of *TP53* somatic mutations identified from RNA-seq data but missed by TCGA WES calls. Mutant allele fraction (MAF) is measured by the ratio between the “number of reads supporting the mutant allele” and the “total number of reads” covering the mutation site.

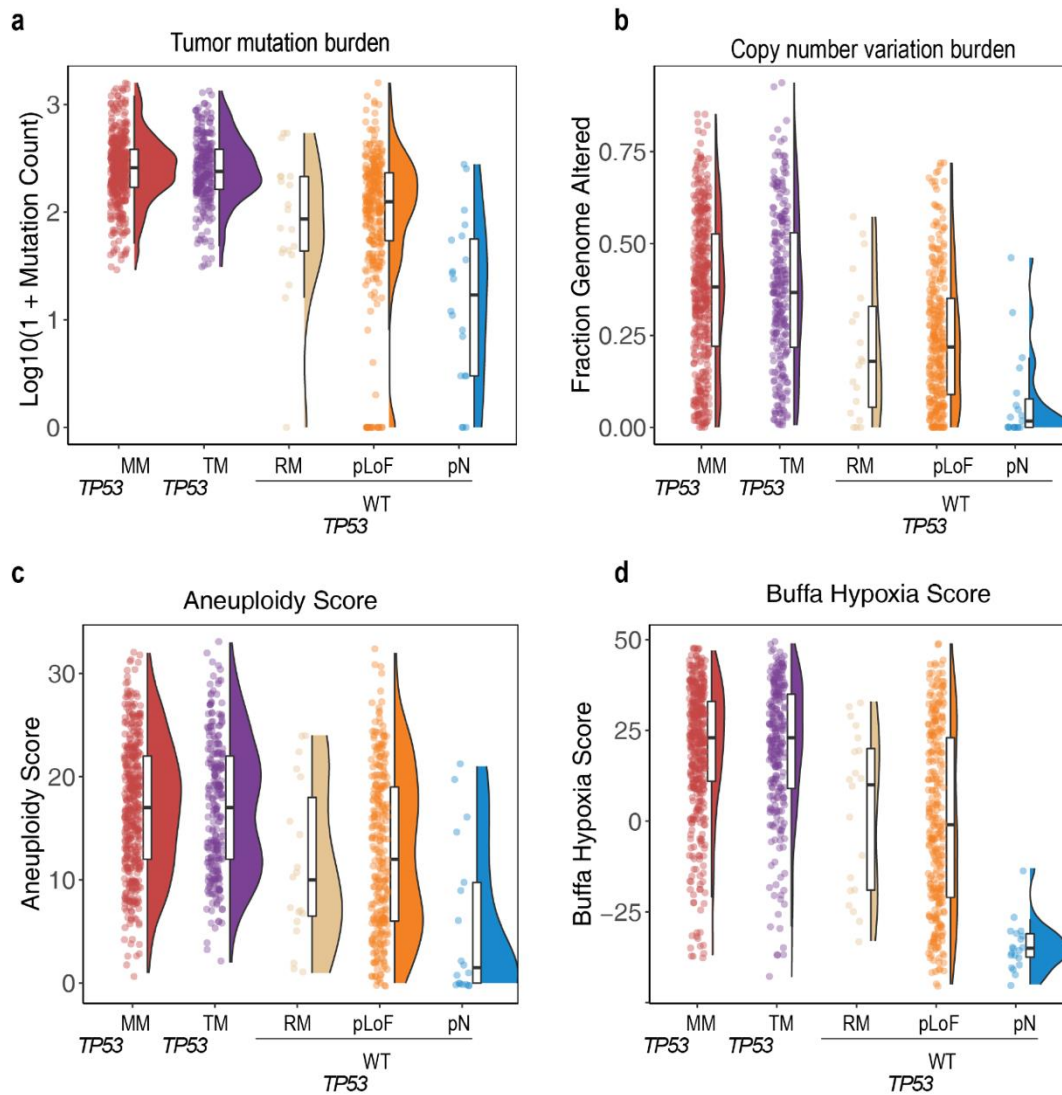

**Supplementary Fig. 11.** p53 mutants identified from RNA-seq data (indicated as the RM group) exhibit similar genomic characteristics as the  $TP53^{MM}$  and  $TP53^{TM}$  groups. Compared to the  $TP53^{WT}$ -pN tumors, tumors of the RM group show increased tumor mutation burden (a), copy number variation burden (b), aneuploidy score (c), and Buffa hypoxia score (d).



1  
2  
3  
4  
5  
6  
7  
8  
9  
10  
11  
12  
13  
14  
15  
16  
17  
18  
19  
20  
21  
22  
23  
24  
25  
26  
27  
28  
29  
30  
31  
32  
33  
34  
35  
36  
37  
38  
39  
40  
41  
42  
43  
44

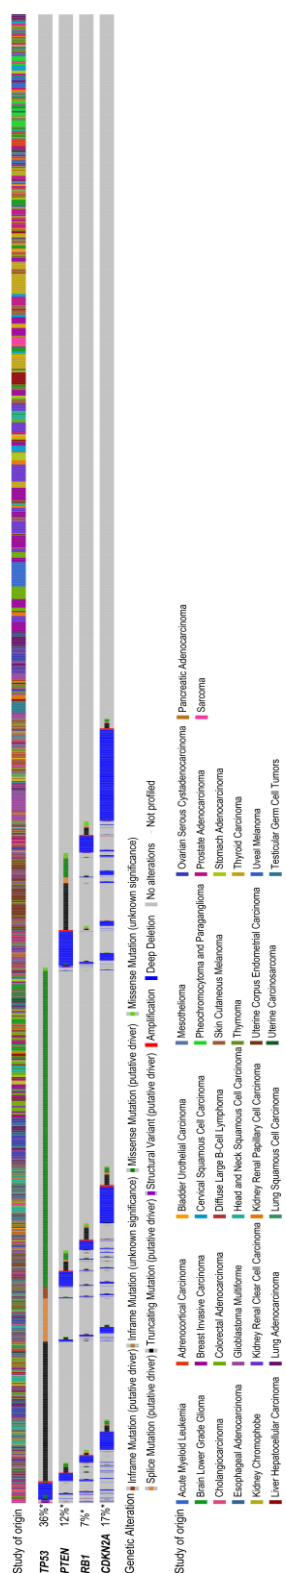

**Supplementary Fig. 12.** Genomics alteration status of *TP53* and the other well-known tumor suppressor genes across different TCGA cancer types.

## 1 **Supplementary tables**

2 Supplementary tables are included in file “SupplementaryData1.xlsx” (table s1-s7 and s9) and  
3 “SupplementaryData2.xlsx” (table s8), which contain our main results and numeric data used to generate figures.

### 4 5 **Supplementary Table 1**

6 List of p53 target genes used in this study.

### 7 **Supplementary Table 2**

8 CES scores of p53 target genes in TCGA LUNG, BRCA, COAD, ESCA, Pan-cancer (including 12 types or  
9 subtypes) cohorts.

### 10 **Supplementary Table 3**

11 The performance metrics of the SVM model in TCGA lung and breast cohorts.

### 12 **Supplementary Table 4**

13 Genomic and clinical characteristics of TCGA LUNG, BRCA, COAD, ESCA, and Pan-cancer cohorts.

### 14 **Supplementary Table 5**

15 Gene signatures reflecting chemo- or radiosensitivity.

### 16 **Supplementary Table 6**

17 Median survival days and CES values of PDX models treated with placebo and radiation therapy (RT).

### 18 **Supplementary Table 7**

19 List of lung and breast cancer samples that have TP53 missense mutations detected from RNA-seq.

### 20 **Supplementary Table 8**

21 List of SVM training samples, prediction samples, TP53 original genetic states, SVM-predicted states and  
22 probabilities of TCGA cancers analyzed in our study.

### 23 **Supplementary Table 9**

24 Summary of SVM models according to the DOME (Data, Optimization, Model and Evaluation) recommendations.  
25
